# Supplementary material for: Clinical practice guidelines of the European Association for Endoscopic Surgery (EAES) on bariatric surgery: update 2020 endorsed by IFSO-EC, EASO and ESPCOP
Source: PubMed Central journal article supplement (PMC7214495; doi:10.1007/s00464-020-07555-y), 2020-04-23
Supplement: 464_2020_7555_MOESM8_ESM.pdf [file 464_2020_7555_MOESM8_ESM.pdf]

**Question:** Should bariatric surgery vs. non-surgical management be used for weight loss?

| Certainty assessment                                |                   |              |               |              |             |                                     | № of patients     |                         | Effect                             |                                                           | Certainty        | Importance |
|-----------------------------------------------------|-------------------|--------------|---------------|--------------|-------------|-------------------------------------|-------------------|-------------------------|------------------------------------|-----------------------------------------------------------|------------------|------------|
| № of studies                                        | Study design      | Risk of bias | Inconsistency | Indirectness | Imprecision | Other considerations                | Bariatric surgery | Non surgical management | Relative (95% CI)                  | Absolute (95% CI)                                         |                  |            |
| <b>EWL (assessed with: %)</b>                       |                   |              |               |              |             |                                     |                   |                         |                                    |                                                           |                  |            |
| 1                                                   | randomised trials | serious      | not serious   | very serious | not serious | very strong association             | 20                | 24                      | -                                  | MD <b>52.6 % higher</b><br>(42.07 higher to 63.13 higher) | ⊕⊕⊕○<br>MODERATE | CRITICAL   |
| <b>Post-intervention weight (assessed with: kg)</b> |                   |              |               |              |             |                                     |                   |                         |                                    |                                                           |                  |            |
| 4                                                   | randomised trials | serious      | serious       | serious      | not serious | strong association                  | 129               | 132                     | -                                  | MD <b>19.25 lower</b><br>(26.94 lower to 11.57 lower)     | ⊕⊕○○<br>LOW      | CRITICAL   |
| <b>Complications</b>                                |                   |              |               |              |             |                                     |                   |                         |                                    |                                                           |                  |            |
| 10                                                  | randomised trials | serious      | serious       | serious      | serious     | publication bias strongly suspected | 226/572 (39.5%)   | 109/423 (25.8%)         | <b>OR 2.44</b><br>(1.47 to 4.06)   | <b>201 more per 1.000</b><br>(from 80 more to 327 more)   | ⊕○○○<br>VERY LOW | CRITICAL   |
| <b>Mortality</b>                                    |                   |              |               |              |             |                                     |                   |                         |                                    |                                                           |                  |            |
| 10                                                  | randomised trials | serious      | not serious   | serious      | not serious | none                                | 0/393 (0.0%)      | 3/296 (1.0%)            | <b>RD -0.01</b><br>(-0.03 to 0.01) | <b>10 more per 1.000</b><br>(from 10 fewer to 30 more)    | ⊕⊕○○<br>LOW      | CRITICAL   |

**HbA1c (assessed with: mg/dL)**

|   |                   |         |              |         |             |      |     |     |   |                                                     |                  |           |
|---|-------------------|---------|--------------|---------|-------------|------|-----|-----|---|-----------------------------------------------------|------------------|-----------|
| 7 | randomised trials | serious | very serious | serious | not serious | none | 289 | 220 | - | MD <b>0.04 lower</b><br>(1.18 lower to 1.09 higher) | ⊕○○○<br>VERY LOW | IMPORTANT |
|---|-------------------|---------|--------------|---------|-------------|------|-----|-----|---|-----------------------------------------------------|------------------|-----------|

**Systolic blood pressure (assessed with: mmHg)**

|   |                   |         |             |         |             |      |     |     |   |                                                     |             |           |
|---|-------------------|---------|-------------|---------|-------------|------|-----|-----|---|-----------------------------------------------------|-------------|-----------|
| 6 | randomised trials | serious | not serious | serious | not serious | none | 260 | 184 | - | MD <b>2.13 lower</b><br>(4.36 lower to 0.09 higher) | ⊕⊕○○<br>LOW | IMPORTANT |
|---|-------------------|---------|-------------|---------|-------------|------|-----|-----|---|-----------------------------------------------------|-------------|-----------|

**Diastolic blood pressure (assessed with: mmHg)**

|   |                   |         |         |         |             |      |     |     |   |                                                    |                  |           |
|---|-------------------|---------|---------|---------|-------------|------|-----|-----|---|----------------------------------------------------|------------------|-----------|
| 6 | randomised trials | serious | serious | serious | not serious | none | 260 | 184 | - | MD <b>1.15 lower</b><br>(3.5 lower to 1.21 higher) | ⊕○○○<br>VERY LOW | IMPORTANT |
|---|-------------------|---------|---------|---------|-------------|------|-----|-----|---|----------------------------------------------------|------------------|-----------|

**Total cholesterol**

|   |                   |         |              |         |             |      |     |     |   |                                                     |                  |           |
|---|-------------------|---------|--------------|---------|-------------|------|-----|-----|---|-----------------------------------------------------|------------------|-----------|
| 7 | randomised trials | serious | very serious | serious | not serious | none | 294 | 223 | - | SMD <b>0.56 lower</b><br>(1.33 lower to 0.2 higher) | ⊕○○○<br>VERY LOW | IMPORTANT |
|---|-------------------|---------|--------------|---------|-------------|------|-----|-----|---|-----------------------------------------------------|------------------|-----------|

**Triglycerides**

|   |                   |         |              |         |             |      |     |     |   |                                                     |                  |           |
|---|-------------------|---------|--------------|---------|-------------|------|-----|-----|---|-----------------------------------------------------|------------------|-----------|
| 6 | randomised trials | serious | very serious | serious | not serious | none | 195 | 182 | - | SMD <b>1.09 lower</b><br>(1.74 lower to 0.44 lower) | ⊕○○○<br>VERY LOW | IMPORTANT |
|---|-------------------|---------|--------------|---------|-------------|------|-----|-----|---|-----------------------------------------------------|------------------|-----------|

**LDL**

|   |                   |         |              |         |             |      |     |     |   |                                                     |                  |           |
|---|-------------------|---------|--------------|---------|-------------|------|-----|-----|---|-----------------------------------------------------|------------------|-----------|
| 6 | randomised trials | serious | very serious | serious | not serious | none | 262 | 174 | - | SMD <b>0.71 lower</b><br>(1.6 lower to 0.18 higher) | ⊕○○○<br>VERY LOW | IMPORTANT |
|---|-------------------|---------|--------------|---------|-------------|------|-----|-----|---|-----------------------------------------------------|------------------|-----------|

**HDL**

|   |                   |         |              |         |             |      |     |     |   |                                                                              |                  |           |
|---|-------------------|---------|--------------|---------|-------------|------|-----|-----|---|------------------------------------------------------------------------------|------------------|-----------|
| 6 | randomised trials | serious | very serious | serious | not serious | none | 260 | 184 | - | SMD<br><b>0.82</b><br><b>higher</b><br>(0.14<br>higher to<br>1.51<br>higher) | ⊕○○○<br>VERY LOW | IMPORTANT |
|---|-------------------|---------|--------------|---------|-------------|------|-----|-----|---|------------------------------------------------------------------------------|------------------|-----------|

**T2DM resolution**

|   |                   |         |             |         |              |                         |                    |              |                                        |                                                                                                    |             |           |
|---|-------------------|---------|-------------|---------|--------------|-------------------------|--------------------|--------------|----------------------------------------|----------------------------------------------------------------------------------------------------|-------------|-----------|
| 5 | randomised trials | serious | not serious | serious | very serious | very strong association | 135/213<br>(63.4%) | 6/115 (5.2%) | <b>OR 29.07</b><br>(12.69 to<br>66.63) | <b>563</b><br><b>more</b><br><b>per</b><br><b>1.000</b><br>(from<br>359<br>more to<br>734<br>more) | ⊕⊕○○<br>LOW | IMPORTANT |
|---|-------------------|---------|-------------|---------|--------------|-------------------------|--------------------|--------------|----------------------------------------|----------------------------------------------------------------------------------------------------|-------------|-----------|

**CI:** Confidence interval; **MD:** Mean difference; **OR:** Odds ratio; **SMD:** Standardised mean difference
