# Supplementary material for: Clinical practice guidelines of the European Association for Endoscopic Surgery (EAES) on bariatric surgery: update 2020 endorsed by IFSO-EC, EASO and ESPCOP
Source: PubMed Central journal article supplement (PMC7214495; doi:10.1007/s00464-020-07555-y), 2020-04-23
Supplement: 464_2020_7555_MOESM12_ESM.pdf [file 464_2020_7555_MOESM12_ESM.pdf]

**Question:** Should assessment of pre-operative psychological conditions vs. no assessment preoperative psychological conditions be used in bariatric surgery prior to operation?

| Certainty assessment |                       |              |               |              |             |                                     | Impact                                                                                                                                                                                                                                                                   | Certainty        | Importance |
|----------------------|-----------------------|--------------|---------------|--------------|-------------|-------------------------------------|--------------------------------------------------------------------------------------------------------------------------------------------------------------------------------------------------------------------------------------------------------------------------|------------------|------------|
| No of studies        | Study design          | Risk of bias | Inconsistency | Indirectness | Imprecision | Other considerations                |                                                                                                                                                                                                                                                                          |                  |            |
| <b>Weight loss</b>   |                       |              |               |              |             |                                     |                                                                                                                                                                                                                                                                          |                  |            |
| 9                    | observational studies | serious      | serious       | not serious  | serious     | publication bias strongly suspected | The authors report "There was conflicting evidence regarding the association between preoperative mental health conditions and postoperative weight loss. Neither depression nor binge eating disorder was consistently associated with differences in weight outcomes." | ⊕○○○<br>VERY LOW | IMPORTANT  |

CI: Confidence interval
