# Supplementary material for: Clinical practice guidelines of the European Association for Endoscopic Surgery (EAES) on bariatric surgery: update 2020 endorsed by IFSO-EC, EASO and ESPCOP
Source: PubMed Central journal article supplement (PMC7214495; doi:10.1007/s00464-020-07555-y), 2020-04-23
Supplement: 464_2020_7555_MOESM15_ESM.pdf [file 464_2020_7555_MOESM15_ESM.pdf]

**Question:** Should high dose pharmacological antithrombotic prophylaxis vs. standard dose antithrombotic prophylaxis be used for prevention of thromboembolism in patients undergoing bariatric surgery?

| Certainty assessment |                   |              |               |              |              |                      | № of patients                                        |                                          | Effect                            |                                                       | Certainty        | Importance |
|----------------------|-------------------|--------------|---------------|--------------|--------------|----------------------|------------------------------------------------------|------------------------------------------|-----------------------------------|-------------------------------------------------------|------------------|------------|
| № of studies         | Study design      | Risk of bias | Inconsistency | Indirectness | Imprecision  | Other considerations | high dose pharmacological antithrombotic prophylaxis | standard dose antithrombotic prophylaxis | Relative (95% CI)                 | Absolute (95% CI)                                     |                  |            |
| <b>DVT</b>           |                   |              |               |              |              |                      |                                                      |                                          |                                   |                                                       |                  |            |
| 2                    | randomised trials | not serious  | not serious   | not serious  | very serious | none                 | 2/231 (0.9%)                                         | 1/217 (0.5%)                             | <b>OR 1.83</b><br>(0.16 to 20.44) | <b>4 more per 1.000</b><br>(from 4 fewer to 82 more)  | ⊕⊕○○<br>LOW      | CRITICAL   |
| <b>Bleeding</b>      |                   |              |               |              |              |                      |                                                      |                                          |                                   |                                                       |                  |            |
| 2                    | randomised trials | not serious  | not serious   | not serious  | serious      | none                 | 8/221 (3.6%)                                         | 6/217 (2.8%)                             | <b>OR 1.22</b><br>(0.41 to 3.64)  | <b>6 more per 1.000</b><br>(from 16 fewer to 66 more) | ⊕⊕⊕○<br>MODERATE | CRITICAL   |

CI: Confidence interval; OR: Odds ratio
