# Supplementary material for: Clinical practice guidelines of the European Association for Endoscopic Surgery (EAES) on bariatric surgery: update 2020 endorsed by IFSO-EC, EASO and ESPCOP
Source: PubMed Central journal article supplement (PMC7214495; doi:10.1007/s00464-020-07555-y), 2020-04-23
Supplement: 464_2020_7555_MOESM17_ESM.pdf [file 464_2020_7555_MOESM17_ESM.pdf]

**Question:** Should ERAS protocol vs. standard care be used for patients undergoing bariatric surgery?

| Certainty assessment                                                           |                       |              |               |              |             |                                                        | N <sup>o</sup> of patients |                 | Effect                        |                                                      | Certainty        | Importance |
|--------------------------------------------------------------------------------|-----------------------|--------------|---------------|--------------|-------------|--------------------------------------------------------|----------------------------|-----------------|-------------------------------|------------------------------------------------------|------------------|------------|
| N <sup>o</sup> of studies                                                      | Study design          | Risk of bias | Inconsistency | Indirectness | Imprecision | Other considerations                                   | ERAS protocol              | standard care   | Relative (95% CI)             | Absolute (95% CI)                                    |                  |            |
| <b>Major postoperative complications (follow up: range 14 days to 8 weeks)</b> |                       |              |               |              |             |                                                        |                            |                 |                               |                                                      |                  |            |
| 5                                                                              | observational studies | serious      | serious       | not serious  | serious     | none                                                   | 163/3278 (5.0%)            | 77/1578 (4.9%)  | <b>OR 0.94</b> (0.58 to 1.51) | <b>3 fewer per 1.000</b> (from 20 fewer to 23 more)  | ⊕○○○<br>VERY LOW | CRITICAL   |
| <b>Minor postoperative complications (follow up: range 14 days to 8 weeks)</b> |                       |              |               |              |             |                                                        |                            |                 |                               |                                                      |                  |            |
| 5                                                                              | observational studies | serious      | very serious  | not serious  | not serious | none                                                   | 370/3278 (11.3%)           | 182/5781 (3.1%) | <b>OR 0.88</b> (0.55 to 1.41) | <b>4 fewer per 1.000</b> (from 14 fewer to 12 more)  | ⊕○○○<br>VERY LOW | IMPORTANT  |
| <b>Length of stay</b>                                                          |                       |              |               |              |             |                                                        |                            |                 |                               |                                                      |                  |            |
| 10                                                                             | observational studies | serious      | very serious  | not serious  | serious     | strong association                                     | 2291                       | 1366            | -                             | <b>MD 2.4 days lower</b> (3.9 lower to 0.9 lower)    | ⊕○○○<br>VERY LOW | CRITICAL   |
| <b>Readmission</b>                                                             |                       |              |               |              |             |                                                        |                            |                 |                               |                                                      |                  |            |
| 9                                                                              | observational studies | serious      | serious       | not serious  | not serious | publication bias strongly suspected strong association | 214/3330 (6.4%)            | 122/1677 (7.3%) | <b>OR 0.86</b> (0.57 to 1.30) | <b>10 fewer per 1.000</b> (from 30 fewer to 20 more) | ⊕○○○<br>VERY LOW | CRITICAL   |

**Mortality**

|   |                       |         |         |             |         |                    |                  |                  |                               |                                                                                   |                  |          |
|---|-----------------------|---------|---------|-------------|---------|--------------------|------------------|------------------|-------------------------------|-----------------------------------------------------------------------------------|------------------|----------|
| 8 | observational studies | serious | serious | not serious | serious | strong association | 1/2006<br>(0.0%) | 3/1163<br>(0.3%) | <b>RR 0.4</b><br>(0.1 to 2.2) | <b>2</b><br><b>fewerper</b><br><b>1.000</b><br>(from 2 fewer to<br><b>3</b> more) | ⊕○○○<br>VERY LOW | CRITICAL |
|---|-----------------------|---------|---------|-------------|---------|--------------------|------------------|------------------|-------------------------------|-----------------------------------------------------------------------------------|------------------|----------|

**Cost**

|   |                       |              |              |         |              |                                                                                                                                                                                     |    |    |   |                                                                            |                  |           |
|---|-----------------------|--------------|--------------|---------|--------------|-------------------------------------------------------------------------------------------------------------------------------------------------------------------------------------|----|----|---|----------------------------------------------------------------------------|------------------|-----------|
| 2 | observational studies | very serious | very serious | serious | very serious | publication bias<br>strongly suspected<br>strong association<br>all plausible<br>residual<br>confounding would<br>reduce the<br>demonstrated<br>effect<br>dose response<br>gradient | 82 | 65 | - | SMD<br><b>1.17 SD</b><br><b>fewer</b><br>(2.83<br>fewer to<br>0.5<br>more) | ⊕○○○<br>VERY LOW | IMPORTANT |
|---|-----------------------|--------------|--------------|---------|--------------|-------------------------------------------------------------------------------------------------------------------------------------------------------------------------------------|----|----|---|----------------------------------------------------------------------------|------------------|-----------|

**CI:** Confidence interval; **OR:** Odds ratio; **MD:** Mean difference; **RR:** Risk ratio; **SMD:** Standardised mean difference
