# Supplementary material for: Clinical practice guidelines of the European Association for Endoscopic Surgery (EAES) on bariatric surgery: update 2020 endorsed by IFSO-EC, EASO and ESPCOP
Source: PubMed Central journal article supplement (PMC7214495; doi:10.1007/s00464-020-07555-y), 2020-04-23
Supplement: 464_2020_7555_MOESM19_ESM.pdf [file 464_2020_7555_MOESM19_ESM.pdf]

**Question:** Should sleeve gastrectomy vs. LAGB be used for weight loss?

| Certainty assessment                              |                   |              |               |              |             |                      | N <sup>o</sup> of patients |      | Effect            |                                                 | Certainty   | Importance |
|---------------------------------------------------|-------------------|--------------|---------------|--------------|-------------|----------------------|----------------------------|------|-------------------|-------------------------------------------------|-------------|------------|
| N <sup>o</sup> of studies                         | Study design      | Risk of bias | Inconsistency | Indirectness | Imprecision | Other considerations | sleeve gastrectomy         | LAGB | Relative (95% CI) | Absolute (95% CI)                               |             |            |
| <b>%EWL (follow up: range 1 years to 5 years)</b> |                   |              |               |              |             |                      |                            |      |                   |                                                 |             |            |
| 11                                                | randomised trials | serious      | not serious   | not serious  | serious     | none                 | 0                          | 0    | -                 | MD <b>26 % lower</b><br>(6.4 lower to 41 lower) | ⊕⊕○○<br>LOW |            |

CI: Confidence interval; MD: Mean difference
