# Supplementary material for: Clinical practice guidelines of the European Association for Endoscopic Surgery (EAES) on bariatric surgery: update 2020 endorsed by IFSO-EC, EASO and ESPCOP
Source: PubMed Central journal article supplement (PMC7214495; doi:10.1007/s00464-020-07555-y), 2020-04-23
Supplement: 464_2020_7555_MOESM28_ESM.pdf [file 464_2020_7555_MOESM28_ESM.pdf]

**Question:** Should BPD/DS vs. RYGB be used for weight loss?

| Certainty assessment          |                   |                            |                            |                        |                           |                                                                         | N <sub>o</sub> of patients |               | Effect                         |                                                       | Certainty        | Importance |
|-------------------------------|-------------------|----------------------------|----------------------------|------------------------|---------------------------|-------------------------------------------------------------------------|----------------------------|---------------|--------------------------------|-------------------------------------------------------|------------------|------------|
| N <sub>o</sub> of studies     | Study design      | Risk of bias               | Inconsistency              | Indirectness           | Imprecision               | Other considerations                                                    | BPD/DS                     | RYGB          | Relative (95% CI)              | Absolute (95% CI)                                     |                  |            |
| <b>3 year weight loss</b>     |                   |                            |                            |                        |                           |                                                                         |                            |               |                                |                                                       |                  |            |
| 2                             | randomised trials | not serious                | very serious               | serious <sup>a</sup>   | very serious <sup>b</sup> | none                                                                    | 44                         | 43            | -                              | MD <b>14.97 higher</b> (12.21 lower to 42.15 higher)  | ⊕○○○<br>VERY LOW | CRITICAL   |
| <b>30-day morbidity</b>       |                   |                            |                            |                        |                           |                                                                         |                            |               |                                |                                                       |                  |            |
| 3                             | randomised trials | not serious <sup>c</sup>   | serious <sup>a</sup>       | serious <sup>a</sup>   | very serious <sup>b</sup> | all plausible residual confounding would reduce the demonstrated effect | 17/66 (25.8%)              | 12/80 (15.0%) | <b>OR 2.24</b> (0.67 to 7.55)  | <b>133 more per 1.000</b> (from 44 fewer to 421 more) | ⊕○○○<br>VERY LOW | CRITICAL   |
| <b>Long term morbidity</b>    |                   |                            |                            |                        |                           |                                                                         |                            |               |                                |                                                       |                  |            |
| 2                             | randomised trials | not serious                | not serious                | serious <sup>a</sup>   | serious <sup>d</sup>      | none                                                                    | 13/49 (26.5%)              | 6/55 (10.9%)  | <b>OR 3.38</b> (1.14 to 10.05) | <b>184 more per 1.000</b> (from 13 more to 443 more)  | ⊕⊕○○<br>LOW      | CRITICAL   |
| <b>30-day mortality</b>       |                   |                            |                            |                        |                           |                                                                         |                            |               |                                |                                                       |                  |            |
| 2                             | randomised trials | not serious                | not serious                | serious <sup>a,b</sup> | very serious <sup>b</sup> | none                                                                    | 1/44 (2.3%)                | 0/43 (0.0%)   | <b>RR 0.02</b> (-0.05 to 0.10) | <b>0 fewer per 1.000</b> (from 90 fewer to 90 more)   | ⊕○○○<br>VERY LOW | CRITICAL   |
| <b>T2DM remission</b>         |                   |                            |                            |                        |                           |                                                                         |                            |               |                                |                                                       |                  |            |
| 2                             | randomised trials | not serious <sup>a,d</sup> | not serious <sup>a,d</sup> | serious <sup>a,b</sup> | very serious <sup>b</sup> | very strong association <sup>a,d</sup>                                  | 43/44 (97.7%)              | 34/43 (79.1%) | <b>OR 8.06</b> (1.35 to 48.14) | <b>178 more per 1.000</b> (from 45 more to 204 more)  | ⊕⊕⊕○<br>MODERATE | IMPORTANT  |
| <b>Hypertension remission</b> |                   |                            |                            |                        |                           |                                                                         |                            |               |                                |                                                       |                  |            |

|   |                   |             |             |                        |                           |      |               |               |                                  |                                                          |                  |           |
|---|-------------------|-------------|-------------|------------------------|---------------------------|------|---------------|---------------|----------------------------------|----------------------------------------------------------|------------------|-----------|
| 1 | randomised trials | not serious | not serious | serious <sup>a,b</sup> | very serious <sup>b</sup> | none | 17/20 (85.0%) | 16/20 (80.0%) | <b>OR 1.42</b><br>(0.27 to 7.34) | <b>50 more per 1.000</b><br>(from 281 fewer to 167 more) | ⊕○○○<br>VERY LOW | IMPORTANT |
|---|-------------------|-------------|-------------|------------------------|---------------------------|------|---------------|---------------|----------------------------------|----------------------------------------------------------|------------------|-----------|

#### Dyslipidemia remission

|   |                   |             |             |                      |                           |      |               |               |                                   |                                                          |                  |           |
|---|-------------------|-------------|-------------|----------------------|---------------------------|------|---------------|---------------|-----------------------------------|----------------------------------------------------------|------------------|-----------|
| 1 | randomised trials | not serious | not serious | serious <sup>a</sup> | very serious <sup>b</sup> | none | 18/20 (90.0%) | 17/20 (85.0%) | <b>OR 1.59</b><br>(0.24 to 10.70) | <b>50 more per 1.000</b><br>(from 274 fewer to 134 more) | ⊕○○○<br>VERY LOW | IMPORTANT |
|---|-------------------|-------------|-------------|----------------------|---------------------------|------|---------------|---------------|-----------------------------------|----------------------------------------------------------|------------------|-----------|

#### Iron deficiency anemia

|   |                   |             |             |                      |                           |      |             |              |                                  |                                                          |                  |           |
|---|-------------------|-------------|-------------|----------------------|---------------------------|------|-------------|--------------|----------------------------------|----------------------------------------------------------|------------------|-----------|
| 2 | randomised trials | not serious | not serious | serious <sup>a</sup> | very serious <sup>b</sup> | none | 4/44 (9.1%) | 5/43 (11.6%) | <b>OR 0.76</b><br>(0.19 to 3.04) | <b>25 fewer per 1.000</b><br>(from 92 fewer to 169 more) | ⊕○○○<br>VERY LOW | IMPORTANT |
|---|-------------------|-------------|-------------|----------------------|---------------------------|------|-------------|--------------|----------------------------------|----------------------------------------------------------|------------------|-----------|

#### Hypoalbuminemia

|   |                   |             |             |                      |                           |      |             |             |                                   |                                                       |                  |           |
|---|-------------------|-------------|-------------|----------------------|---------------------------|------|-------------|-------------|-----------------------------------|-------------------------------------------------------|------------------|-----------|
| 2 | randomised trials | not serious | not serious | serious <sup>a</sup> | very serious <sup>b</sup> | none | 2/44 (4.5%) | 0/43 (0.0%) | <b>OR 0.05</b><br>(-0.04 to 0.13) | <b>0 fewer per 1.000</b><br>(from 0 fewer to 0 fewer) | ⊕○○○<br>VERY LOW | IMPORTANT |
|---|-------------------|-------------|-------------|----------------------|---------------------------|------|-------------|-------------|-----------------------------------|-------------------------------------------------------|------------------|-----------|

#### Overall Mortality

|   |                   |                           |                           |                             |                             |                                                    |             |             |                                   |                                                       |                  |          |
|---|-------------------|---------------------------|---------------------------|-----------------------------|-----------------------------|----------------------------------------------------|-------------|-------------|-----------------------------------|-------------------------------------------------------|------------------|----------|
| 1 | randomised trials | very serious <sup>c</sup> | very serious <sup>c</sup> | very serious <sup>b,c</sup> | very serious <sup>b,c</sup> | publication bias strongly suspected <sup>b,c</sup> | 1/24 (4.2%) | 0/23 (0.0%) | <b>OR 0.04</b><br>(-0.07 to 0.15) | <b>0 fewer per 1.000</b><br>(from 0 fewer to 0 fewer) | ⊕○○○<br>VERY LOW | CRITICAL |
|---|-------------------|---------------------------|---------------------------|-----------------------------|-----------------------------|----------------------------------------------------|-------------|-------------|-----------------------------------|-------------------------------------------------------|------------------|----------|

#### Weight Regain

|   |                   |                    |             |             |                           |      |             |             |                                   |                                                     |             |           |
|---|-------------------|--------------------|-------------|-------------|---------------------------|------|-------------|-------------|-----------------------------------|-----------------------------------------------------|-------------|-----------|
| 1 | randomised trials | not serious<br>b,c | not serious | not serious | very serious <sup>c</sup> | none | 0/24 (0.0%) | 0/23 (0.0%) | <b>OR 0.00</b><br>(-0.08 to 0.08) | -- per<br><b>1.000</b><br>(from 0 fewer to 0 fewer) | ⊕⊕○○<br>LOW | IMPORTANT |
|---|-------------------|--------------------|-------------|-------------|---------------------------|------|-------------|-------------|-----------------------------------|-----------------------------------------------------|-------------|-----------|

**CI:** Confidence interval; **MD:** Mean difference; **OR:** Odds ratio; **RR:** Risk ratio
