# Supplementary material for: Clinical practice guidelines of the European Association for Endoscopic Surgery (EAES) on bariatric surgery: update 2020 endorsed by IFSO-EC, EASO and ESPCOP
Source: PubMed Central journal article supplement (PMC7214495; doi:10.1007/s00464-020-07555-y), 2020-04-23
Supplement: 464_2020_7555_MOESM29_ESM.pdf [file 464_2020_7555_MOESM29_ESM.pdf]

**Question:** Should OAGB vs. RYGB be used for weight loss?

| Certainty assessment      |                   |              |               |              |             |                      | N <sub>o</sub> of patients |      | Effect            |                                                     | Certainty        | Importance |
|---------------------------|-------------------|--------------|---------------|--------------|-------------|----------------------|----------------------------|------|-------------------|-----------------------------------------------------|------------------|------------|
| N <sub>o</sub> of studies | Study design      | Risk of bias | Inconsistency | Indirectness | Imprecision | Other considerations | OAGB                       | RYGB | Relative (95% CI) | Absolute (95% CI)                                   |                  |            |
| <b>EWL</b>                |                   |              |               |              |             |                      |                            |      |                   |                                                     |                  |            |
| 2                         | randomised trials | serious      | very serious  | not serious  | serious     | strong association   | 220                        | 224  | -                 | MD <b>13.23 higher</b> (2.05 lower to 28.51 higher) | ⊕○○○<br>VERY LOW |            |
