# Supplementary material for: Clinical practice guidelines of the European Association for Endoscopic Surgery (EAES) on bariatric surgery: update 2020 endorsed by IFSO-EC, EASO and ESPCOP
Source: PubMed Central journal article supplement (PMC7214495; doi:10.1007/s00464-020-07555-y), 2020-04-23
Supplement: 464_2020_7555_MOESM32_ESM.pdf [file 464_2020_7555_MOESM32_ESM.pdf]

**Question:** Should OAGB vs. gastric plication be used for weight loss?

| № of studies                  | Study design      | Risk of bias | Certainty assessment |              |              |                    | Other considerations | № of patients |                                     | Effect                                                |                   | Certainty | Importance |
|-------------------------------|-------------------|--------------|----------------------|--------------|--------------|--------------------|----------------------|---------------|-------------------------------------|-------------------------------------------------------|-------------------|-----------|------------|
|                               |                   |              | Inconsistency        | Indirectness | Imprecision  |                    |                      | OAGB          | gastric plication                   | Relative (95% CI)                                     | Absolute (95% CI) |           |            |
| <b>EWL</b>                    |                   |              |                      |              |              |                    |                      |               |                                     |                                                       |                   |           |            |
| 1                             | randomised trials | serious      | not serious          | not serious  | serious      | none               | 20                   | 20            | -                                   | MD <b>6.1 higher</b><br>(6.58 lower to 18.78 higher)  | ⊕⊕○○<br>LOW       |           |            |
| <b>Iron deficiency anemia</b> |                   |              |                      |              |              |                    |                      |               |                                     |                                                       |                   |           |            |
| 1                             | randomised trials | serious      | not serious          | serious      | very serious | strong association | 4/20 (20.0%)         | 0/20 (0.0%)   | <b>OR 11.18</b><br>(0.56 to 222.98) | <b>0 fewer per 1.000</b><br>(from 0 fewer to 0 fewer) | ⊕○○○<br>VERY LOW  |           |            |

**CI:** Confidence interval; **MD:** Mean difference; **OR:** Odds ratio
