# Supplementary material for: Clinical practice guidelines of the European Association for Endoscopic Surgery (EAES) on bariatric surgery: update 2020 endorsed by IFSO-EC, EASO and ESPCOP
Source: PubMed Central journal article supplement (PMC7214495; doi:10.1007/s00464-020-07555-y), 2020-04-23
Supplement: 464_2020_7555_MOESM35_ESM.pdf [file 464_2020_7555_MOESM35_ESM.pdf]

**Question:** Should SADI-S vs. sleeve gastrectomy be used for weight loss?

| Certainty assessment                                  |                       |              |               |              |             |                      | № of patients |                    | Effect                            |                                                         | Certainty        | Importance |
|-------------------------------------------------------|-----------------------|--------------|---------------|--------------|-------------|----------------------|---------------|--------------------|-----------------------------------|---------------------------------------------------------|------------------|------------|
| № of studies                                          | Study design          | Risk of bias | Inconsistency | Indirectness | Imprecision | Other considerations | SADI-S        | sleeve gastrectomy | Relative (95% CI)                 | Absolute (95% CI)                                       |                  |            |
| <b>EWL (follow up: 12 months; assessed with: %)</b>   |                       |              |               |              |             |                      |               |                    |                                   |                                                         |                  |            |
| 1                                                     | observational studies | serious      | not serious   | not serious  | serious     | none                 | 26            | 29                 | -                                 | MD <b>19.7 higher</b><br>(8.33 higher to 31.07 higher)  | ⊕○○○<br>VERY LOW | IMPORTANT  |
| <b>Mortality (follow up: 30 days)</b>                 |                       |              |               |              |             |                      |               |                    |                                   |                                                         |                  |            |
| 1                                                     | observational studies | serious      | not serious   | not serious  | serious     | none                 | 0/89 (0.0%)   | 0/89 (0.0%)        | <b>RD 0.00</b><br>(-0.02 to 0.02) | <b>0 fewer per 1.000</b><br>(from 20 fewer to 20 more)  | ⊕○○○<br>VERY LOW | CRITICAL   |
| <b>Morbidity (follow up: 30 days)</b>                 |                       |              |               |              |             |                      |               |                    |                                   |                                                         |                  |            |
| 1                                                     | observational studies | serious      | not serious   | not serious  | serious     | none                 | 13/89 (14.6%) | 8/89 (9.0%)        | <b>OR 1.73</b><br>(0.68 to 4.41)  | <b>56 more per 1.000</b><br>(from 27 fewer to 214 more) | ⊕○○○<br>VERY LOW | CRITICAL   |
| <b>HbA1c (follow up: 12 months; assessed with: %)</b> |                       |              |               |              |             |                      |               |                    |                                   |                                                         |                  |            |
| 1                                                     | observational studies | serious      | not serious   | not serious  | not serious | none                 | 26            | 26                 | -                                 | MD <b>0</b><br>(0.38 lower to 0.38 higher)              | ⊕○○○<br>VERY LOW | IMPORTANT  |
| <b>Hypertension (follow up: 12 months)</b>            |                       |              |               |              |             |                      |               |                    |                                   |                                                         |                  |            |

|   |                       |         |             |             |              |      |             |              |                                  |                                                           |                  |           |
|---|-----------------------|---------|-------------|-------------|--------------|------|-------------|--------------|----------------------------------|-----------------------------------------------------------|------------------|-----------|
| 1 | observational studies | serious | not serious | not serious | very serious | none | 2/26 (7.7%) | 4/29 (13.8%) | <b>OR 0.52</b><br>(0.09 to 3.11) | <b>61 fewer per 1.000</b><br>(from 124 fewer to 194 more) | ⊕○○○<br>VERY LOW | IMPORTANT |
|---|-----------------------|---------|-------------|-------------|--------------|------|-------------|--------------|----------------------------------|-----------------------------------------------------------|------------------|-----------|

**Dyslipidemia (follow up: 12 months)**

|   |                       |         |             |             |              |      |             |              |                                  |                                                           |                  |           |
|---|-----------------------|---------|-------------|-------------|--------------|------|-------------|--------------|----------------------------------|-----------------------------------------------------------|------------------|-----------|
| 1 | observational studies | serious | not serious | not serious | very serious | none | 1/26 (3.8%) | 6/29 (20.7%) | <b>OR 0.15</b><br>(0.02 to 1.37) | <b>169 fewer per 1.000</b><br>(from 202 fewer to 56 more) | ⊕○○○<br>VERY LOW | IMPORTANT |
|---|-----------------------|---------|-------------|-------------|--------------|------|-------------|--------------|----------------------------------|-----------------------------------------------------------|------------------|-----------|

**SBP (follow up: 12 months; assessed with: mmHg)**

|   |                       |         |             |             |             |      |    |    |   |                                                    |                  |           |
|---|-----------------------|---------|-------------|-------------|-------------|------|----|----|---|----------------------------------------------------|------------------|-----------|
| 1 | observational studies | serious | not serious | not serious | not serious | none | 26 | 29 | - | <b>MD 1 higher</b><br>(8.25 lower to 10.25 higher) | ⊕○○○<br>VERY LOW | IMPORTANT |
|---|-----------------------|---------|-------------|-------------|-------------|------|----|----|---|----------------------------------------------------|------------------|-----------|

**DBP (follow up: 12 months; assessed with: mmHg)**

|   |                       |         |             |             |             |      |    |    |   |                                                     |                  |           |
|---|-----------------------|---------|-------------|-------------|-------------|------|----|----|---|-----------------------------------------------------|------------------|-----------|
| 1 | observational studies | serious | not serious | not serious | not serious | none | 26 | 29 | - | <b>MD 2.5 higher</b><br>(4.81 lower to 9.81 higher) | ⊕○○○<br>VERY LOW | IMPORTANT |
|---|-----------------------|---------|-------------|-------------|-------------|------|----|----|---|-----------------------------------------------------|------------------|-----------|

**Triglycerides (follow up: 12 months; assessed with: mg/dL)**

|   |                       |         |             |             |              |      |    |    |   |                                                     |                  |           |
|---|-----------------------|---------|-------------|-------------|--------------|------|----|----|---|-----------------------------------------------------|------------------|-----------|
| 1 | observational studies | serious | not serious | not serious | very serious | none | 26 | 29 | - | <b>MD 17.1 lower</b><br>(33.57 lower to 0.63 lower) | ⊕○○○<br>VERY LOW | IMPORTANT |
|---|-----------------------|---------|-------------|-------------|--------------|------|----|----|---|-----------------------------------------------------|------------------|-----------|

**HDL (follow up: 12 months; assessed with: mg/dL)**

|   |                       |         |             |             |             |      |    |    |   |                                                     |                  |           |
|---|-----------------------|---------|-------------|-------------|-------------|------|----|----|---|-----------------------------------------------------|------------------|-----------|
| 1 | observational studies | serious | not serious | not serious | not serious | none | 26 | 29 | - | <b>MD 1.9 higher</b><br>(3.95 lower to 7.75 higher) | ⊕○○○<br>VERY LOW | IMPORTANT |
|---|-----------------------|---------|-------------|-------------|-------------|------|----|----|---|-----------------------------------------------------|------------------|-----------|

**LDL (follow up: 12 months; assessed with: mg/dL)**

|   |                       |         |             |             |         |      |    |    |   |                                                      |                  |           |
|---|-----------------------|---------|-------------|-------------|---------|------|----|----|---|------------------------------------------------------|------------------|-----------|
| 1 | observational studies | serious | not serious | not serious | serious | none | 26 | 29 | - | MD <b>14.4 lower</b><br>(30.19 lower to 1.39 higher) | ⊕○○○<br>VERY LOW | IMPORTANT |
|---|-----------------------|---------|-------------|-------------|---------|------|----|----|---|------------------------------------------------------|------------------|-----------|

**Total cholesterol (follow up: 12 months; assessed with: mg/dL)**

|   |                       |         |             |             |             |      |    |    |   |                                                  |                  |           |
|---|-----------------------|---------|-------------|-------------|-------------|------|----|----|---|--------------------------------------------------|------------------|-----------|
| 1 | observational studies | serious | not serious | not serious | not serious | none | 26 | 29 | - | MD <b>11.1 lower</b><br>(27 lower to 4.8 higher) | ⊕○○○<br>VERY LOW | IMPORTANT |
|---|-----------------------|---------|-------------|-------------|-------------|------|----|----|---|--------------------------------------------------|------------------|-----------|

**Iron (follow up: 12 months; assessed with: ug/dL)**

|   |                       |         |             |             |         |                    |    |    |   |                                                 |                  |           |
|---|-----------------------|---------|-------------|-------------|---------|--------------------|----|----|---|-------------------------------------------------|------------------|-----------|
| 1 | observational studies | serious | not serious | not serious | serious | strong association | 26 | 29 | - | MD <b>34.1 lower</b><br>(59 lower to 9.2 lower) | ⊕○○○<br>VERY LOW | IMPORTANT |
|---|-----------------------|---------|-------------|-------------|---------|--------------------|----|----|---|-------------------------------------------------|------------------|-----------|

**Hemoglobin (follow up: 12 months; assessed with: g/dL)**

|   |                       |         |             |             |         |      |    |    |   |                                                    |                  |           |
|---|-----------------------|---------|-------------|-------------|---------|------|----|----|---|----------------------------------------------------|------------------|-----------|
| 1 | observational studies | serious | not serious | not serious | serious | none | 26 | 29 | - | MD <b>0.9 lower</b><br>(2.01 lower to 0.21 higher) | ⊕○○○<br>VERY LOW | IMPORTANT |
|---|-----------------------|---------|-------------|-------------|---------|------|----|----|---|----------------------------------------------------|------------------|-----------|

**Albumin (follow up: 12 months; assessed with: mg/dL)**

|   |                       |         |             |             |             |      |    |    |   |                                            |                  |           |
|---|-----------------------|---------|-------------|-------------|-------------|------|----|----|---|--------------------------------------------|------------------|-----------|
| 1 | observational studies | serious | not serious | not serious | not serious | none | 26 | 29 | - | MD <b>0</b><br>(0.13 lower to 0.13 higher) | ⊕○○○<br>VERY LOW | IMPORTANT |
|---|-----------------------|---------|-------------|-------------|-------------|------|----|----|---|--------------------------------------------|------------------|-----------|

**Calcium (follow up: 12 months; assessed with: mg/dL)**

|   |                       |         |             |             |              |      |    |    |   |                                                   |                  |           |
|---|-----------------------|---------|-------------|-------------|--------------|------|----|----|---|---------------------------------------------------|------------------|-----------|
| 1 | observational studies | serious | not serious | not serious | very serious | none | 26 | 29 | - | MD <b>0.2 lower</b><br>(0.39 lower to 0.01 lower) | ⊕○○○<br>VERY LOW | IMPORTANT |
|---|-----------------------|---------|-------------|-------------|--------------|------|----|----|---|---------------------------------------------------|------------------|-----------|

CI: Confidence interval; MD: Mean difference; OR: Odds ratio
