# Supplementary material for: Clinical practice guidelines of the European Association for Endoscopic Surgery (EAES) on bariatric surgery: update 2020 endorsed by IFSO-EC, EASO and ESPCOP
Source: PubMed Central journal article supplement (PMC7214495; doi:10.1007/s00464-020-07555-y), 2020-04-23
Supplement: 464_2020_7555_MOESM38_ESM.pdf [file 464_2020_7555_MOESM38_ESM.pdf]

**Question:** Should scheduled post-operative follow up vs. no post-operative follow up be used in patients undergoing bariatric surgery?

| Certainty assessment                                                                           |                   |              |               |              |             |                      | N <sub>o</sub> of patients         |                             | Effect            |                                                   | Certainty        | Importance |
|------------------------------------------------------------------------------------------------|-------------------|--------------|---------------|--------------|-------------|----------------------|------------------------------------|-----------------------------|-------------------|---------------------------------------------------|------------------|------------|
| N <sub>o</sub> of studies                                                                      | Study design      | Risk of bias | Inconsistency | Indirectness | Imprecision | Other considerations | scheduled post-operative follow up | no post-operative follow up | Relative (95% CI) | Absolute (95% CI)                                 |                  |            |
| <b>Weight loss/weight regain (follow up: range 6 months to 12 months; assessed with: %EWL)</b> |                   |              |               |              |             |                      |                                    |                             |                   |                                                   |                  |            |
| 5                                                                                              | randomised trials | serious      | serious       | not serious  | not serious | strong association   | 163                                | 163                         | -                 | MD <b>1.6 higher</b> (0.82 higher to 2.38 higher) | ⊕⊕⊕○<br>MODERATE |            |

CI: Confidence interval; MD: Mean difference
