# Supplementary material for: Clinical practice guidelines of the European Association for Endoscopic Surgery (EAES) on bariatric surgery: update 2020 endorsed by IFSO-EC, EASO and ESPCOP
Source: Springer Nature journal article supplement (doi:10.1007/s00464-020-07555-y), 2020-04-23
Supplement: MOESM9 [file 17923114]

**Question:** Should preoperative Helicobacter pylori eradication vs. standard care be used for prevention of foregut symptoms in patients undergoing bariatric surgery?

| Certainty assessment                                           |                       |              |               |              |              |                      | N <sup>o</sup> of patients                                                                            |               | Effect                                                                                            |                   | Certainty | Importance |
|----------------------------------------------------------------|-----------------------|--------------|---------------|--------------|--------------|----------------------|-------------------------------------------------------------------------------------------------------|---------------|---------------------------------------------------------------------------------------------------|-------------------|-----------|------------|
| N <sup>o</sup> of studies                                      | Study design          | Risk of bias | Inconsistency | Indirectness | Imprecision  | Other considerations | preoperative Helicobacter pylori eradication                                                          | standard care | Relative (95% CI)                                                                                 | Absolute (95% CI) |           |            |
| <b>Marginal ulcer (follow up: range 3 months to 60 months)</b> |                       |              |               |              |              |                      |                                                                                                       |               |                                                                                                   |                   |           |            |
| 4                                                              | observational studies | not serious  | very serious  | very serious | very serious | none                 | The OR for H. pylori positive status versus H. pylori negative status was 0.51, 95% CI 0.03 to 8.35.  |               | <br>VERY LOW   |                   | IMPORTANT |            |
| <b>Postoperative complications</b>                             |                       |              |               |              |              |                      |                                                                                                       |               |                                                                                                   |                   |           |            |
| 5                                                              | observational studies | not serious  | very serious  | very serious | very serious | none                 | The OR for H. pylori positive status versus H. pylori negative status was 2.86, 95% CI 0.26 to 31.27. |               | <br>VERY LOW   |                   | CRITICAL  |            |
| <b>Incidence of bleeding</b>                                   |                       |              |               |              |              |                      |                                                                                                       |               |                                                                                                   |                   |           |            |
| 3                                                              | observational studies | not serious  | not serious   | very serious | very serious | none                 | The OR for H. pylori positive status versus H. pylori negative status was 0.90, 95% CI 0.23–3.52.     |               | <br>VERY LOW  |                   | CRITICAL  |            |
| <b>Incidence of leakage</b>                                    |                       |              |               |              |              |                      |                                                                                                       |               |                                                                                                   |                   |           |            |
| 4                                                              | observational studies | not serious  | very serious  | very serious | very serious | none                 | The OR for H. pylori positive status versus H. pylori negative status was 1.62, 95% CI 0.17 to 15.62. |               | <br>VERY LOW |                   | CRITICAL  |            |

CI: Confidence interval
