# Supplementary material for: Clinical practice guidelines of the European Association for Endoscopic Surgery (EAES) on bariatric surgery: update 2020 endorsed by IFSO-EC, EASO and ESPCOP
Source: Springer Nature journal article supplement (doi:10.1007/s00464-020-07555-y), 2020-04-23
Supplement: MOESM11 [file 17923114]

**Question:** Should preoperative esophagogastrosocopy vs. no endoscopy be used for preoperative evaluation in patients undergoing bariatric surgery?

| Certainty assessment      |              |              |               |              |             |                      | N <sub>e</sub> of patients        |              | Effect            |                   | Certainty | Importance |
|---------------------------|--------------|--------------|---------------|--------------|-------------|----------------------|-----------------------------------|--------------|-------------------|-------------------|-----------|------------|
| N <sub>e</sub> of studies | Study design | Risk of bias | Inconsistency | Indirectness | Imprecision | Other considerations | preoperative esophagogastrosocopy | no endoscopy | Relative (95% CI) | Absolute (95% CI) |           |            |

**Change of surgical management**

|    |                       |         |         |         |             |                                     |                                                                                                                                     |  |      |          |           |
|----|-----------------------|---------|---------|---------|-------------|-------------------------------------|-------------------------------------------------------------------------------------------------------------------------------------|--|------|----------|-----------|
| 23 | observational studies | serious | serious | serious | not serious | publication bias strongly suspected | Meta-analysis yielded a proportion of change in surgical management after EGD in 7.8% (95% CI, 6.1 to 9.5; I <sup>2</sup> = 98.1%). |  | ⊕○○○ | VERY LOW | IMPORTANT |
|----|-----------------------|---------|---------|---------|-------------|-------------------------------------|-------------------------------------------------------------------------------------------------------------------------------------|--|------|----------|-----------|

**Change of medical management**

|    |                       |         |         |         |             |                                     |                                                                                                                                  |  |      |          |           |
|----|-----------------------|---------|---------|---------|-------------|-------------------------------------|----------------------------------------------------------------------------------------------------------------------------------|--|------|----------|-----------|
| 20 | observational studies | serious | serious | serious | not serious | publication bias strongly suspected | Meta-analysis found a proportion of change in medical management after EGD of 27.5% (95% CI, 20.2-34.8; I <sup>2</sup> = 98.6%). |  | ⊕○○○ | VERY LOW | IMPORTANT |
|----|-----------------------|---------|---------|---------|-------------|-------------------------------------|----------------------------------------------------------------------------------------------------------------------------------|--|------|----------|-----------|

CI: Confidence interval
