# Supplementary material for: Clinical practice guidelines of the European Association for Endoscopic Surgery (EAES) on bariatric surgery: update 2020 endorsed by IFSO-EC, EASO and ESPCOP
Source: Springer Nature journal article supplement (doi:10.1007/s00464-020-07555-y), 2020-04-23
Supplement: MOESM13 [file 17923114]

**Question:** Should perioperative OSA screening vs. no OSA screening be used for prevention of respiratory complications after bariatric surgery?

| Certainty assessment           |                       |              |               |              |             |                      | N <sub>e</sub> of patients  |                   | Effect                            |                                                       | Certainty        | Importance |
|--------------------------------|-----------------------|--------------|---------------|--------------|-------------|----------------------|-----------------------------|-------------------|-----------------------------------|-------------------------------------------------------|------------------|------------|
| N <sub>e</sub> of studies      | Study design          | Risk of bias | Inconsistency | Indirectness | Imprecision | Other considerations | Perioperative OSA screening | No OSA screening  | Relative (95% CI)                 | Absolute (95% CI)                                     |                  |            |
| <b>Mortality</b>               |                       |              |               |              |             |                      |                             |                   |                                   |                                                       |                  |            |
| 5                              | observational studies | not serious  | not serious   | serious      | not serious | none                 | 68/34882 (0.2%)             | 174/60858 (0.3%)  | <b>OR 3.39</b><br>(0.12 to 92.08) | <b>7 more per 1.000</b><br>(from 3 fewer to 206 more) | ⊕○○○<br>VERY LOW | CRITICAL   |
| <b>Pulmonary complications</b> |                       |              |               |              |             |                      |                             |                   |                                   |                                                       |                  |            |
| 7                              | observational studies | not serious  | not serious   | serious      | not serious | none                 | 1819/67481 (2.7%)           | 327/116601 (0.3%) | <b>OR 1.85</b><br>(0.46 to 7.42)  | <b>2 more per 1.000</b><br>(from 2 fewer to 18 more)  | ⊕○○○<br>VERY LOW | CRITICAL   |
| <b>Pneumonia</b>               |                       |              |               |              |             |                      |                             |                   |                                   |                                                       |                  |            |
| 5                              | observational studies | not serious  | not serious   | serious      | not serious | none                 | 239/34328 (0.7%)            | 593/60665 (1.0%)  | <b>OR 2.51</b><br>(0.68 to 9.21)  | <b>14 more per 1.000</b><br>(from 3 fewer to 74 more) | ⊕○○○<br>VERY LOW | IMPORTANT  |
| <b>Cardiac complications</b>   |                       |              |               |              |             |                      |                             |                   |                                   |                                                       |                  |            |
| 4                              | observational studies | not serious  | not serious   | serious      | not serious | none                 | 80/34196 (0.2%)             | 77/58690 (0.1%)   | <b>OR 1.85</b><br>(0.72 to 4.75)  | <b>1 more per 1.000</b><br>(from 0 fewer to 5 more)   | ⊕○○○<br>VERY LOW | CRITICAL   |

**Cardiac complications (assessed with: Atrial fibrillation)**

|   |                       |             |             |         |             |      |                     |                     |                                  |                                                    |                  |          |
|---|-----------------------|-------------|-------------|---------|-------------|------|---------------------|---------------------|----------------------------------|----------------------------------------------------|------------------|----------|
| 2 | observational studies | not serious | not serious | serious | not serious | none | 623/33814<br>(1.8%) | 698/58011<br>(1.2%) | <b>OR 1.51</b><br>(1.36 to 1.69) | <b>6 more per 1.000</b><br>(from 4 more to 8 more) | ⊕○○○<br>VERY LOW | CRITICAL |
|---|-----------------------|-------------|-------------|---------|-------------|------|---------------------|---------------------|----------------------------------|----------------------------------------------------|------------------|----------|

**Length of Stay**

|   |                       |             |             |         |             |      |       |       |   |                                                           |                  |           |
|---|-----------------------|-------------|-------------|---------|-------------|------|-------|-------|---|-----------------------------------------------------------|------------------|-----------|
| 5 | observational studies | not serious | not serious | serious | not serious | none | 33787 | 59475 | - | <b>MD 0.69 days higher</b><br>(0.17 lower to 1.57 higher) | ⊕○○○<br>VERY LOW | IMPORTANT |
|---|-----------------------|-------------|-------------|---------|-------------|------|-------|-------|---|-----------------------------------------------------------|------------------|-----------|

**Hypoxemia (assessed with: SpO2 (%) day 0,1( mean, SD))**

|   |                       |             |             |         |             |      |     |     |   |                                                     |                  |          |
|---|-----------------------|-------------|-------------|---------|-------------|------|-----|-----|---|-----------------------------------------------------|------------------|----------|
| 3 | observational studies | not serious | not serious | serious | not serious | none | 395 | 833 | - | <b>MD 3.8 % lower</b><br>(5.38 lower to 2.21 lower) | ⊕○○○<br>VERY LOW | CRITICAL |
|---|-----------------------|-------------|-------------|---------|-------------|------|-----|-----|---|-----------------------------------------------------|------------------|----------|

**CI:** Confidence interval; **OR:** Odds ratio; **MD:** Mean difference
