# Supplementary material for: Clinical practice guidelines of the European Association for Endoscopic Surgery (EAES) on bariatric surgery: update 2020 endorsed by IFSO-EC, EASO and ESPCOP
Source: Springer Nature journal article supplement (doi:10.1007/s00464-020-07555-y), 2020-04-23
Supplement: MOESM16 [file 17923114]

**Question:** Should inferior vena cava filter (IVCF) vs. low molecular weight heparin (LMWH) and intermittent pneumatic compression (IPC) be used for prevention of thromboembolism in patients undergoing bariatric surgery?

| Certainty assessment      |              |              |               |              |             |                      | N <sub>2</sub> of patients       |                                                                                   | Effect            |                   | Certainty | Importance |
|---------------------------|--------------|--------------|---------------|--------------|-------------|----------------------|----------------------------------|-----------------------------------------------------------------------------------|-------------------|-------------------|-----------|------------|
| N <sub>2</sub> of studies | Study design | Risk of bias | Inconsistency | Indirectness | Imprecision | Other considerations | inferior vena cava filter (IVCF) | low molecular weight heparine (LMWH) and intermittent pneumatic compression (IPC) | Relative (95% CI) | Absolute (95% CI) |           |            |

**DVT**

|   |                       |             |             |             |             |      |                |                |                                  |                                                      |             |          |
|---|-----------------------|-------------|-------------|-------------|-------------|------|----------------|----------------|----------------------------------|------------------------------------------------------|-------------|----------|
| 3 | observational studies | not serious | not serious | not serious | not serious | none | 22/1779 (1.2%) | 38/7081 (0.5%) | <b>OR 1.98</b><br>(1.04 to 3.75) | <b>5 more per 1.000</b><br>(from 0 fewer to 14 more) | ⊕⊕○○<br>LOW | CRITICAL |
|---|-----------------------|-------------|-------------|-------------|-------------|------|----------------|----------------|----------------------------------|------------------------------------------------------|-------------|----------|

**Pulmonary embolism**

|   |                       |             |             |             |             |      |                |                |                                  |                                                       |             |          |
|---|-----------------------|-------------|-------------|-------------|-------------|------|----------------|----------------|----------------------------------|-------------------------------------------------------|-------------|----------|
| 2 | observational studies | not serious | not serious | not serious | not serious | none | 10/1237 (0.8%) | 10/1247 (0.8%) | <b>OR 1.02</b><br>(0.42 to 2.46) | <b>0 fewer per 1.000</b><br>(from 5 fewer to 11 more) | ⊕⊕○○<br>LOW | CRITICAL |
|---|-----------------------|-------------|-------------|-------------|-------------|------|----------------|----------------|----------------------------------|-------------------------------------------------------|-------------|----------|

**Serious complications**

|   |                   |             |             |             |             |      |               |                 |                                  |                                                       |              |  |
|---|-------------------|-------------|-------------|-------------|-------------|------|---------------|-----------------|----------------------------------|-------------------------------------------------------|--------------|--|
| 1 | randomised trials | not serious | not serious | not serious | not serious | none | 26/542 (4.8%) | 214/5834 (3.7%) | <b>OR 1.32</b><br>(0.87 to 2.01) | <b>11 more per 1.000</b><br>(from 5 fewer to 34 more) | ⊕⊕⊕⊕<br>HIGH |  |
|---|-------------------|-------------|-------------|-------------|-------------|------|---------------|-----------------|----------------------------------|-------------------------------------------------------|--------------|--|

**Post-operative mortality (30 days)**

|   |                       |             |             |             |             |      |                   |                   |                                  |                                                     |             |          |
|---|-----------------------|-------------|-------------|-------------|-------------|------|-------------------|-------------------|----------------------------------|-----------------------------------------------------|-------------|----------|
| 3 | observational studies | not serious | not serious | not serious | not serious | none | 15/1779<br>(0.8%) | 31/7081<br>(0.4%) | <b>OR 3.14</b><br>(1.49 to 6.63) | <b>9 more per 1.000</b><br>(from 2 more to 24 more) | ⊕⊕○○<br>LOW | CRITICAL |
|---|-----------------------|-------------|-------------|-------------|-------------|------|-------------------|-------------------|----------------------------------|-----------------------------------------------------|-------------|----------|

**CI:** Confidence interval; **OR:** Odds ratio
