# Supplementary material for: Clinical practice guidelines of the European Association for Endoscopic Surgery (EAES) on bariatric surgery: update 2020 endorsed by IFSO-EC, EASO and ESPCOP
Source: Springer Nature journal article supplement (doi:10.1007/s00464-020-07555-y), 2020-04-23
Supplement: MOESM18 [file 17923114]

**Question:** Should multimodal analgesia with minimal use of opioids vs. standard analgesia be used for pain control in patients after bariatric surgery?

| Certainty assessment                 |                       |              |               |              |              |                      | № of patients                                    |                    | Effect                             |                                                        | Certainty        | Importance |
|--------------------------------------|-----------------------|--------------|---------------|--------------|--------------|----------------------|--------------------------------------------------|--------------------|------------------------------------|--------------------------------------------------------|------------------|------------|
| № of studies                         | Study design          | Risk of bias | Inconsistency | Indirectness | Imprecision  | Other considerations | multimodal analgesia with minimal use of opioids | standard analgesia | Relative (95% CI)                  | Absolute (95% CI)                                      |                  |            |
| <b>Mortality</b>                     |                       |              |               |              |              |                      |                                                  |                    |                                    |                                                        |                  |            |
| 1                                    | observational studies | serious      | not serious   | not serious  | very serious | none                 | 1/245 (0.4%)                                     | 0/384 (0.0%)       | <b>OR 4.72</b><br>(0.19 to 116.28) | <b>0 fewer per 1.000</b><br>(from 0 fewer to 0 fewer)  | ⊕○○○<br>VERY LOW | CRITICAL   |
| <b>Re-intubation</b>                 |                       |              |               |              |              |                      |                                                  |                    |                                    |                                                        |                  |            |
| 1                                    | observational studies | serious      | not serious   | serious      | very serious | none                 | 2/245 (0.8%)                                     | 2/384 (0.5%)       | <b>OR 1.57</b><br>(0.22 to 11.23)  | <b>3 more per 1.000</b><br>(from 4 fewer to 50 more)   | ⊕○○○<br>VERY LOW | CRITICAL   |
| <b>Cardio-vascular complications</b> |                       |              |               |              |              |                      |                                                  |                    |                                    |                                                        |                  |            |
| 1                                    | observational studies | serious      | not serious   | not serious  | very serious | none                 | 1/245 (0.4%)                                     | 3/384 (0.8%)       | <b>OR 0.52</b><br>(0.05 to 5.03)   | <b>4 fewer per 1.000</b><br>(from 7 fewer to 30 more)  | ⊕○○○<br>VERY LOW | CRITICAL   |
| <b>Pulmonary complications</b>       |                       |              |               |              |              |                      |                                                  |                    |                                    |                                                        |                  |            |
| 1                                    | observational studies | serious      | not serious   | serious      | very serious | none                 | 5/245 (2.0%)                                     | 1/384 (0.3%)       | <b>OR 7.98</b><br>(0.93 to 68.71)  | <b>18 more per 1.000</b><br>(from 0 fewer to 150 more) | ⊕○○○<br>VERY LOW | CRITICAL   |

**Pulmonary complications**

|   |                   |             |             |             |             |      |              |              |                                    |                                     |              |          |
|---|-------------------|-------------|-------------|-------------|-------------|------|--------------|--------------|------------------------------------|-------------------------------------|--------------|----------|
| 3 | randomised trials | not serious | not serious | not serious | not serious | none | 2/252 (0.8%) | 9/279 (3.2%) | <b>RD -0.02</b><br>(-0.05 to 0.00) | -- per <b>1.000</b><br>(from to --) | ⊕⊕⊕⊕<br>HIGH | CRITICAL |
|---|-------------------|-------------|-------------|-------------|-------------|------|--------------|--------------|------------------------------------|-------------------------------------|--------------|----------|

**Morphine consumption (assessed with: mg in first 24 h postoperative)**

|   |                   |             |             |             |             |      |     |     |   |                                                        |              |           |
|---|-------------------|-------------|-------------|-------------|-------------|------|-----|-----|---|--------------------------------------------------------|--------------|-----------|
| 8 | randomised trials | not serious | not serious | not serious | not serious | none | 345 | 376 | - | MD <b>1.66 mg lower</b><br>(2.43 lower to 0.88 higher) | ⊕⊕⊕⊕<br>HIGH | IMPORTANT |
|---|-------------------|-------------|-------------|-------------|-------------|------|-----|-----|---|--------------------------------------------------------|--------------|-----------|

**VAS score (30 min - 1 h) (assessed with: 1-10)**

|   |                   |             |             |              |             |      |     |     |   |                                                           |             |           |
|---|-------------------|-------------|-------------|--------------|-------------|------|-----|-----|---|-----------------------------------------------------------|-------------|-----------|
| 5 | randomised trials | not serious | not serious | very serious | not serious | none | 101 | 213 | - | MD <b>0.64 number lower</b><br>(1.21 lower to 0.07 lower) | ⊕⊕○○<br>LOW | IMPORTANT |
|---|-------------------|-------------|-------------|--------------|-------------|------|-----|-----|---|-----------------------------------------------------------|-------------|-----------|

**VAS score (6h)**

|   |                   |             |             |             |             |      |     |     |   |                                                            |              |           |
|---|-------------------|-------------|-------------|-------------|-------------|------|-----|-----|---|------------------------------------------------------------|--------------|-----------|
| 3 | randomised trials | not serious | not serious | not serious | not serious | none | 126 | 148 | - | MD <b>1.71 number lower</b><br>(3.49 lower to 0.06 higher) | ⊕⊕⊕⊕<br>HIGH | IMPORTANT |
|---|-------------------|-------------|-------------|-------------|-------------|------|-----|-----|---|------------------------------------------------------------|--------------|-----------|

**VAS score (12h)**

|   |                   |             |             |             |             |      |    |     |   |                                                          |              |           |
|---|-------------------|-------------|-------------|-------------|-------------|------|----|-----|---|----------------------------------------------------------|--------------|-----------|
| 2 | randomised trials | not serious | not serious | not serious | not serious | none | 98 | 120 | - | MD <b>0.75 number lower</b><br>(1.6 lower to 0.1 higher) | ⊕⊕⊕⊕<br>HIGH | IMPORTANT |
|---|-------------------|-------------|-------------|-------------|-------------|------|----|-----|---|----------------------------------------------------------|--------------|-----------|

**Length of stay in PACU (assessed with: min)**

|   |                   |             |             |             |             |      |     |     |   |                                                        |              |           |
|---|-------------------|-------------|-------------|-------------|-------------|------|-----|-----|---|--------------------------------------------------------|--------------|-----------|
| 2 | randomised trials | not serious | not serious | not serious | not serious | none | 112 | 121 | - | MD <b>0.99 min lower</b><br>(1.45 lower to 0.52 lower) | ⊕⊕⊕⊕<br>HIGH | IMPORTANT |
|---|-------------------|-------------|-------------|-------------|-------------|------|-----|-----|---|--------------------------------------------------------|--------------|-----------|

**Nausea and Vomiting**

|   |                   |             |             |             |             |      |                   |                   |                                  |                                                            |              |           |
|---|-------------------|-------------|-------------|-------------|-------------|------|-------------------|-------------------|----------------------------------|------------------------------------------------------------|--------------|-----------|
| 4 | randomised trials | not serious | not serious | not serious | not serious | none | 36/190<br>(18.9%) | 76/216<br>(35.2%) | <b>OR 0.40</b><br>(0.25 to 0.64) | <b>173 fewer per 1.000</b><br>(from 232 fewer to 94 fewer) | ⊕⊕⊕⊕<br>HIGH | IMPORTANT |
|---|-------------------|-------------|-------------|-------------|-------------|------|-------------------|-------------------|----------------------------------|------------------------------------------------------------|--------------|-----------|

**CI:** Confidence interval; **OR:** Odds ratio; **MD:** Mean difference
