# Supplementary material for: Clinical practice guidelines of the European Association for Endoscopic Surgery (EAES) on bariatric surgery: update 2020 endorsed by IFSO-EC, EASO and ESPCOP
Source: Springer Nature journal article supplement (doi:10.1007/s00464-020-07555-y), 2020-04-23
Supplement: MOESM21 [file 17923114]

**Question:** Should staple line reinforcement vs. no staple line reinforcement be used in patients undergoing sleeve gastrectomy?

| Certainty assessment |              |              |               |              |             |                      | № of patients             |                              | Effect            |                   | Certainty | Importance |
|----------------------|--------------|--------------|---------------|--------------|-------------|----------------------|---------------------------|------------------------------|-------------------|-------------------|-----------|------------|
| № of studies         | Study design | Risk of bias | Inconsistency | Indirectness | Imprecision | Other considerations | staple line reinforcement | no staple line reinforcement | Relative (95% CI) | Absolute (95% CI) |           |            |

**overall complications**

|   |                   |             |             |             |             |      |  |  |                               |                                                       |              |          |
|---|-------------------|-------------|-------------|-------------|-------------|------|--|--|-------------------------------|-------------------------------------------------------|--------------|----------|
| 8 | randomised trials | not serious | not serious | not serious | not serious | none |  |  | <b>RR 0.7</b><br>(0.5 to 0.9) | <b>1 fewer per 1.000</b><br>(from 1 fewer to 1 fewer) | ⊕⊕⊕⊕<br>HIGH | CRITICAL |
|---|-------------------|-------------|-------------|-------------|-------------|------|--|--|-------------------------------|-------------------------------------------------------|--------------|----------|

**Bleeding**

|   |                   |             |             |             |         |      |  |  |                                  |                                                       |                  |          |
|---|-------------------|-------------|-------------|-------------|---------|------|--|--|----------------------------------|-------------------------------------------------------|------------------|----------|
| 8 | randomised trials | not serious | not serious | not serious | serious | none |  |  | <b>OR 0.56</b><br>(0.25 to 1.27) | <b>1 fewer per 1.000</b><br>(from 1 fewer to 0 fewer) | ⊕⊕⊕○<br>MODERATE | CRITICAL |
|---|-------------------|-------------|-------------|-------------|---------|------|--|--|----------------------------------|-------------------------------------------------------|------------------|----------|

**leak**

|   |                   |             |         |             |         |      |  |  |                                  |                                                       |             |          |
|---|-------------------|-------------|---------|-------------|---------|------|--|--|----------------------------------|-------------------------------------------------------|-------------|----------|
| 8 | randomised trials | not serious | serious | not serious | serious | none |  |  | <b>RR 0.60</b><br>(0.27 to 1.50) | <b>1 fewer per 1.000</b><br>(from 2 fewer to 0 fewer) | ⊕⊕○○<br>LOW | CRITICAL |
|---|-------------------|-------------|---------|-------------|---------|------|--|--|----------------------------------|-------------------------------------------------------|-------------|----------|

CI: Confidence interval; RR: Risk ratio; OR: Odds ratio
