# Supplementary material for: Clinical practice guidelines of the European Association for Endoscopic Surgery (EAES) on bariatric surgery: update 2020 endorsed by IFSO-EC, EASO and ESPCOP
Source: Springer Nature journal article supplement (doi:10.1007/s00464-020-07555-y), 2020-04-23
Supplement: MOESM23 [file 17923114]

**Question:** Should sleeve gastrectomy with antral resection (2-3 cm) vs. antral preservation (>5 cm) be used for weight loss?

| Certainty assessment                           |                       |              |               |              |             |                      | № of patients                                     |                             | Effect                           |                                                       | Certainty        | Importance |
|------------------------------------------------|-----------------------|--------------|---------------|--------------|-------------|----------------------|---------------------------------------------------|-----------------------------|----------------------------------|-------------------------------------------------------|------------------|------------|
| № of studies                                   | Study design          | Risk of bias | Inconsistency | Indirectness | Imprecision | Other considerations | sleeve gastrectomy with antral resection (2-3 cm) | antral preservation (>5 cm) | Relative (95% CI)                | Absolute (95% CI)                                     |                  |            |
| <b>Weight loss (follow up: mean 24 months)</b> |                       |              |               |              |             |                      |                                                   |                             |                                  |                                                       |                  |            |
| 4                                              | observational studies | serious      | serious       | serious      | serious     | none                 | 0                                                 | 0                           | -                                | MD <b>0.95 higher</b><br>(0.32 higher to 1.58 higher) | ⊕○○○<br>VERY LOW | CRITICAL   |
| <b>Bibliography: staple line leak</b>          |                       |              |               |              |             |                      |                                                   |                             |                                  |                                                       |                  |            |
| 4                                              | observational studies | serious      | serious       | serious      | serious     | none                 | 0/0                                               | 0/0                         | RR <b>1.87</b><br>(0.46 to 7.61) | <b>2 fewer per 1.000</b><br>(from 8 fewer to 0 fewer) | ⊕○○○<br>VERY LOW | CRITICAL   |
| <b>Staple line bleed</b>                       |                       |              |               |              |             |                      |                                                   |                             |                                  |                                                       |                  |            |
| 5                                              | observational studies | serious      | serious       | serious      | serious     | none                 | 0/0                                               | 0/0                         | RR <b>1.27</b><br>(0.40 to 4.01) | <b>1 fewer per 1.000</b><br>(from 4 fewer to 0 fewer) | ⊕○○○<br>VERY LOW | CRITICAL   |
| <b>gerd</b>                                    |                       |              |               |              |             |                      |                                                   |                             |                                  |                                                       |                  |            |
| 3                                              | observational studies | serious      | serious       | serious      | not serious | none                 | 0/0                                               | 0/0                         | RR <b>0.69</b><br>(0.26 to 1.82) | <b>1 fewer per 1.000</b><br>(from 2 fewer to 0 fewer) | ⊕○○○<br>VERY LOW | IMPORTANT  |

CI: Confidence interval; MD: Mean difference; RR: Risk ratio
