# Supplementary material for: Clinical practice guidelines of the European Association for Endoscopic Surgery (EAES) on bariatric surgery: update 2020 endorsed by IFSO-EC, EASO and ESPCOP
Source: Springer Nature journal article supplement (doi:10.1007/s00464-020-07555-y), 2020-04-23
Supplement: MOESM25 [file 17923114]

**Question:** Should RYGB vs. gastric plication be used for weight loss in obese patients?

| Certainty assessment                               |                   |                      |               |              |             |                      | № of patients |                   | Effect                            |                                                        | Certainty   | Importance |
|----------------------------------------------------|-------------------|----------------------|---------------|--------------|-------------|----------------------|---------------|-------------------|-----------------------------------|--------------------------------------------------------|-------------|------------|
| № of studies                                       | Study design      | Risk of bias         | Inconsistency | Indirectness | Imprecision | Other considerations | RYGB          | gastric plication | Relative (95% CI)                 | Absolute (95% CI)                                      |             |            |
| <b>T2DM (follow up: range 3 months to 5 years)</b> |                   |                      |               |              |             |                      |               |                   |                                   |                                                        |             |            |
| 25                                                 | randomised trials | serious <sup>a</sup> | not serious   | not serious  | serious     | none                 |               |                   | <b>RR 4.00</b><br>(1.40 to 11.11) | <b>4 fewer per 1.000</b><br>(from 11 fewer to 1 fewer) | ⊕⊕○○<br>LOW | IMPORTANT  |

CI: Confidence interval; RR: Risk ratio
