# Supplementary material for: Clinical practice guidelines of the European Association for Endoscopic Surgery (EAES) on bariatric surgery: update 2020 endorsed by IFSO-EC, EASO and ESPCOP
Source: Springer Nature journal article supplement (doi:10.1007/s00464-020-07555-y), 2020-04-23
Supplement: MOESM26 [file 17923114]

**Author(s):** It includes GERD recommendation

**Question:** RYGB compared to sleeve gastrectomy for weight loss in obese patients

**Setting:** Question 6

**Bibliography:**

| Certainty assessment                                                        |                       |              |               |              |             |                      | N <sub>o</sub> of patients |                    | Effect                 |                                                | Certainty        | Importance |
|-----------------------------------------------------------------------------|-----------------------|--------------|---------------|--------------|-------------|----------------------|----------------------------|--------------------|------------------------|------------------------------------------------|------------------|------------|
| N <sub>o</sub> of studies                                                   | Study design          | Risk of bias | Inconsistency | Indirectness | Imprecision | Other considerations | RYGB                       | sleeve gastrectomy | Relative (95% CI)      | Absolute (95% CI)                              |                  |            |
| <b>EWL (follow up: range 1 years to 5 years; assessed with: %)</b>          |                       |              |               |              |             |                      |                            |                    |                        |                                                |                  |            |
| 11                                                                          | randomised trials     | serious      | not serious   | not serious  | not serious | none                 |                            |                    | -                      | MD 4 % higher (14 lower to 8.2 higher)         | ⊕⊕⊕○<br>MODERATE | CRITICAL   |
| <b>T2DM (follow up: range 3 months to 5 years)</b>                          |                       |              |               |              |             |                      |                            |                    |                        |                                                |                  |            |
| 25                                                                          | randomised trials     | serious      | not serious   | not serious  | not serious | none                 | 117/226 (51.8%)            | 104/223 (46.6%)    | RR 0.89 (0.74 to 1.06) | 51 fewer per 1.000 (from 121 fewer to 28 more) | ⊕⊕⊕○<br>MODERATE | IMPORTANT  |
| <b>Long-term major complications (follow up: range 1 months to 5 years)</b> |                       |              |               |              |             |                      |                            |                    |                        |                                                |                  |            |
| 6                                                                           | randomised trials     | serious      | serious       | not serious  | serious     | none                 | 6/345 (1.7%)               | 3/350 (0.9%)       | OR 1.56 (0.51 to 4.76) | 5 more per 1.000 (from 4 fewer to 31 more)     | ⊕○○○<br>VERY LOW | CRITICAL   |
| <b>Long term minor complications (follow up: range 1 months to 5 years)</b> |                       |              |               |              |             |                      |                            |                    |                        |                                                |                  |            |
| 6                                                                           | randomised trials     | serious      | serious       | not serious  | not serious | none                 | 17/205 (8.3%)              | 10/213 (4.7%)      | OR 1.56 (0.68 to 3.57) | 24 more per 1.000 (from 15 fewer to 103 more)  | ⊕⊕○○<br>LOW      | IMPORTANT  |
| <b>Hypertension remission (follow up: range 2 months to 5 years)</b>        |                       |              |               |              |             |                      |                            |                    |                        |                                                |                  |            |
| 21                                                                          | observational studies | serious      | serious       | serious      | not serious | none                 | 552/920 (60.0%)            | 323/632 (51.1%)    | OR 0.70 (0.86 to 0.87) | 89 fewer per 1.000 (from 38 fewer to 35 fewer) | ⊕○○○<br>VERY LOW | IMPORTANT  |
| <b>Dyslipidemia resolution (follow up: range 2 months to 5 years)</b>       |                       |              |               |              |             |                      |                            |                    |                        |                                                |                  |            |

|    |                       |         |         |         |             |      |                    |                    |                                  |                                                             |                  |           |
|----|-----------------------|---------|---------|---------|-------------|------|--------------------|--------------------|----------------------------------|-------------------------------------------------------------|------------------|-----------|
| 14 | observational studies | serious | serious | serious | not serious | none | 489/689<br>(71.0%) | 287/580<br>(49.5%) | <b>OR 0.42</b><br>(0.33 to 0.53) | <b>203 fewer per 1.000</b><br>(from 251 fewer to 153 fewer) | ⊕○○○<br>VERY LOW | IMPORTANT |
|----|-----------------------|---------|---------|---------|-------------|------|--------------------|--------------------|----------------------------------|-------------------------------------------------------------|------------------|-----------|

**GERD (follow up: range 2 months to 5 years)**

|    |                       |         |         |         |             |                    |                    |                  |                                  |                                                             |                  |           |
|----|-----------------------|---------|---------|---------|-------------|--------------------|--------------------|------------------|----------------------------------|-------------------------------------------------------------|------------------|-----------|
| 11 | observational studies | serious | serious | serious | not serious | strong association | 109/147<br>(74.1%) | 26/93<br>(28.0%) | <b>OR 0.11</b><br>(0.06 to 0.21) | <b>239 fewer per 1.000</b><br>(from 257 fewer to 204 fewer) | ⊕○○○<br>VERY LOW | IMPORTANT |
|----|-----------------------|---------|---------|---------|-------------|--------------------|--------------------|------------------|----------------------------------|-------------------------------------------------------------|------------------|-----------|

**OSAS (follow up: range 2 months to 5 years)**

|    |                       |         |             |         |             |      |                    |                    |                                  |                                                          |                  |           |
|----|-----------------------|---------|-------------|---------|-------------|------|--------------------|--------------------|----------------------------------|----------------------------------------------------------|------------------|-----------|
| 11 | observational studies | serious | not serious | serious | not serious | none | 205/270<br>(75.9%) | 160/247<br>(64.8%) | <b>OR 0.44</b><br>(0.19 to 1.04) | <b>201 fewer per 1.000</b><br>(from 389 fewer to 9 more) | ⊕○○○<br>VERY LOW | IMPORTANT |
|----|-----------------------|---------|-------------|---------|-------------|------|--------------------|--------------------|----------------------------------|----------------------------------------------------------|------------------|-----------|

**Minor operative morbidity (follow up: range 1 months to 5 years)**

|   |                   |                      |                      |             |             |      |                  |                  |                                  |                                                         |             |           |
|---|-------------------|----------------------|----------------------|-------------|-------------|------|------------------|------------------|----------------------------------|---------------------------------------------------------|-------------|-----------|
| 6 | randomised trials | serious <sup>a</sup> | serious <sup>b</sup> | not serious | not serious | none | 28/316<br>(8.9%) | 19/317<br>(6.0%) | <b>OR 1.43</b><br>(0.60 to 3.23) | <b>24 more per 1.000</b><br>(from 23 fewer to 111 more) | ⊕⊕○○<br>LOW | IMPORTANT |
|---|-------------------|----------------------|----------------------|-------------|-------------|------|------------------|------------------|----------------------------------|---------------------------------------------------------|-------------|-----------|

**Major operative morbidity (follow up: range 1 months to 5 years)**

|   |                   |                      |                      |             |             |      |                  |                  |                                  |                                                       |             |          |
|---|-------------------|----------------------|----------------------|-------------|-------------|------|------------------|------------------|----------------------------------|-------------------------------------------------------|-------------|----------|
| 6 | randomised trials | serious <sup>a</sup> | serious <sup>b</sup> | not serious | not serious | none | 26/346<br>(7.5%) | 12/347<br>(3.5%) | <b>OR 2.04</b><br>(1.00 to 4.16) | <b>34 more per 1.000</b><br>(from 0 fewer to 95 more) | ⊕⊕○○<br>LOW | CRITICAL |
|---|-------------------|----------------------|----------------------|-------------|-------------|------|------------------|------------------|----------------------------------|-------------------------------------------------------|-------------|----------|

**GERD remission in pre-existing GERD (follow up: 5 years)**

|   |                   |         |             |             |             |      |     |     |   |                                                      |                  |           |
|---|-------------------|---------|-------------|-------------|-------------|------|-----|-----|---|------------------------------------------------------|------------------|-----------|
| 1 | randomised trials | serious | not serious | not serious | not serious | none | 104 | 101 | - | <b>AD 0.36 % lower</b><br>(0.57 lower to 0.15 lower) | ⊕⊕⊕○<br>MODERATE | IMPORTANT |
|---|-------------------|---------|-------------|-------------|-------------|------|-----|-----|---|------------------------------------------------------|------------------|-----------|

**De novo GERD (follow up: 5 years)**

|   |                   |         |             |             |         |      |    |    |   |                                                                         |             |           |
|---|-------------------|---------|-------------|-------------|---------|------|----|----|---|-------------------------------------------------------------------------|-------------|-----------|
| 1 | randomised trials | serious | not serious | not serious | serious | none | 56 | 57 | - | AD <b>0.31</b><br>% <b>lower</b><br>(0.08<br>lower to<br>0.54<br>lower) | ⊕⊕○○<br>LOW | IMPORTANT |
|---|-------------------|---------|-------------|-------------|---------|------|----|----|---|-------------------------------------------------------------------------|-------------|-----------|

**CI:** Confidence interval; **MD:** Mean difference; **RR:** Risk ratio; **OR:** Odds ratio

**Explanations**

- a. Heterogeneity between the studies
- b. Inconsistency between the studies
