# Supplementary material for: Clinical practice guidelines of the European Association for Endoscopic Surgery (EAES) on bariatric surgery: update 2020 endorsed by IFSO-EC, EASO and ESPCOP
Source: Springer Nature journal article supplement (doi:10.1007/s00464-020-07555-y), 2020-04-23
Supplement: MOESM39 [file 17923114]

**Question:** Should treatment with ursodeoxycolic acid vs. no treatment with ursodeoxycolic acid be used for prevention of gallstone disease after bariatri surgery?

| Certainty assessment                                                |                   |              |               |              |             |                                     | N <sub>o</sub> of patients         |                                       | Effect                           |                                                           | Certainty        | Importance |
|---------------------------------------------------------------------|-------------------|--------------|---------------|--------------|-------------|-------------------------------------|------------------------------------|---------------------------------------|----------------------------------|-----------------------------------------------------------|------------------|------------|
| N <sub>o</sub> of studies                                           | Study design      | Risk of bias | Inconsistency | Indirectness | Imprecision | Other considerations                | treatment with ursodeoxycolic acid | no treatment with ursodeoxycolic acid | Relative (95% CI)                | Absolute (95% CI)                                         |                  |            |
| <b>Gallstone formation (follow up: range 3 months to 18 months)</b> |                   |              |               |              |             |                                     |                                    |                                       |                                  |                                                           |                  |            |
| 8                                                                   | randomised trials | very serious | not serious   | not serious  | not serious | publication bias strongly suspected | 62/825 (7.5%)                      | 64/548 (11.7%)                        | <b>OR 0.20</b><br>(0.13 to 0.33) | <b>91 fewer per 1.000</b><br>(from 100 fewer to 75 fewer) | ⊕○○○<br>VERY LOW |            |

CI: Confidence interval; OR: Odds ratio
