# Supplementary material for: Clinical practice guidelines of the European Association for Endoscopic Surgery (EAES) on bariatric surgery: update 2020 endorsed by IFSO-EC, EASO and ESPCOP
Source: Springer Nature journal article supplement (doi:10.1007/s00464-020-07555-y), 2020-04-23
Supplement: MOESM42 [file 17923114]

**Question:** Should post-operative diet vs. no post-operative diet be used in patients undergoing bariatric surgery?

| Certainty assessment                                               |                   |              |               |              |             |                      | N <sub>o</sub> of patients |                        | Effect            |                                                      | Certainty        | Importance |
|--------------------------------------------------------------------|-------------------|--------------|---------------|--------------|-------------|----------------------|----------------------------|------------------------|-------------------|------------------------------------------------------|------------------|------------|
| N <sub>o</sub> of studies                                          | Study design      | Risk of bias | Inconsistency | Indirectness | Imprecision | Other considerations | post-operative diet        | no post-operative diet | Relative (95% CI) | Absolute (95% CI)                                    |                  |            |
| <b>Weight (follow up: mean 12 months; assessed with: kg)</b>       |                   |              |               |              |             |                      |                            |                        |                   |                                                      |                  |            |
| 6                                                                  | randomised trials | serious      | serious       | serious      | serious     | none                 | 205                        | 196                    | -                 | MD <b>4.55 higher</b> (13.08 higher to 3.99 higher)  | ⊕○○○<br>VERY LOW |            |
| <b>Percentage excess weight change (follow up: mean 12 months)</b> |                   |              |               |              |             |                      |                            |                        |                   |                                                      |                  |            |
| 4                                                                  | randomised trials | serious      | serious       | serious      | not serious | none                 | 106                        | 105                    | -                 | MD <b>10.85 higher</b> (19.02 higher to 2.69 higher) | ⊕○○○<br>VERY LOW |            |
| <b>BMI (follow up: mean 12 months)</b>                             |                   |              |               |              |             |                      |                            |                        |                   |                                                      |                  |            |
| 3                                                                  | randomised trials | serious      | serious       | serious      | not serious | none                 | 106                        | 96                     | -                 | MD <b>2.77 lower</b> (0.72 lower to 6.25 lower)      | ⊕○○○<br>VERY LOW |            |
| <b>Weight change (follow up: mean 24 years; assessed with: kg)</b> |                   |              |               |              |             |                      |                            |                        |                   |                                                      |                  |            |
| 3                                                                  | randomised trials | serious      | serious       | serious      | not serious | none                 | 32                         | 30                     | -                 | MD <b>12.96 lower</b> (4.26 lower to 21.66 lower)    | ⊕○○○<br>VERY LOW |            |

CI: Confidence interval; MD: Mean difference
