# Supplementary material for: Clinical practice guidelines of the European Association for Endoscopic Surgery (EAES) on bariatric surgery: update 2020 endorsed by IFSO-EC, EASO and ESPCOP
Source: Springer Nature journal article supplement (doi:10.1007/s00464-020-07555-y), 2020-04-23
Supplement: MOESM43 [file 17923114]

**Question:** Should delayed pregnancy vs. early pregnancy be used for prevention of fetal complications?

| Certainty assessment        |                       |              |               |              |             |                      | № of patients     |                 | Effect                           |                                                         | Certainty        | Importance |
|-----------------------------|-----------------------|--------------|---------------|--------------|-------------|----------------------|-------------------|-----------------|----------------------------------|---------------------------------------------------------|------------------|------------|
| № of studies                | Study design          | Risk of bias | Inconsistency | Indirectness | Imprecision | Other considerations | delayed pregnancy | early pregnancy | Relative (95% CI)                | Absolute (95% CI)                                       |                  |            |
| <b>Gestational diabetes</b> |                       |              |               |              |             |                      |                   |                 |                                  |                                                         |                  |            |
| 5                           | observational studies | serious      | serious       | serious      | not serious | none                 | 12/115 (10.4%)    | 19/212 (9.0%)   | <b>OR 1.73</b><br>(0.30 to 9.81) | <b>56 more per 1,000</b><br>(from 61 fewer to 402 more) | ⊕○○○<br>VERY LOW |            |

**CI:** Confidence interval; **MD:** Mean difference
