# Supplementary material for: Clinical practice guidelines of the European Association for Endoscopic Surgery (EAES) on bariatric surgery: update 2020 endorsed by IFSO-EC, EASO and ESPCOP
Source: Springer Nature journal article supplement (doi:10.1007/s00464-020-07555-y), 2020-04-23
Supplement: MOESM44 [file 17923114]

**Question:** Should EndoBarrier® vs. non-surgical management be used for weight loss?

| Certainty assessment                                      |                       |                      |                      |              |                           |                                                  | N <sub>o</sub> of patients |                         | Effect                        |                                                    | Certainty     | Importance |  |
|-----------------------------------------------------------|-----------------------|----------------------|----------------------|--------------|---------------------------|--------------------------------------------------|----------------------------|-------------------------|-------------------------------|----------------------------------------------------|---------------|------------|--|
| N <sub>o</sub> of studies                                 | Study design          | Risk of bias         | Inconsistency        | Indirectness | Imprecision               | Other considerations                             | Endobarrier                | non-surgical management | Relative (95% CI)             | Absolute (95% CI)                                  |               |            |  |
| <b>%EWL (follow up: mean 9.2 months)</b>                  |                       |                      |                      |              |                           |                                                  |                            |                         |                               |                                                    |               |            |  |
| 4                                                         | randomised trials     | not serious          | not serious          | not serious  | serious <sup>a</sup>      | none                                             | 301                        |                         | -                             | MD <b>36.9 % more</b> (29.2 more to 44.6 more)     | ⊕⊕⊕○ MODERATE | CRUCIAAL   |  |
| <b>Improvement in %HbA1c (follow up: mean 8.4 months)</b> |                       |                      |                      |              |                           |                                                  |                            |                         |                               |                                                    |               |            |  |
| 14                                                        | observational studies | serious <sup>b</sup> | serious <sup>c</sup> | not serious  | not serious               | publication bias strongly suspected <sup>d</sup> | 388                        |                         | -                             | MD <b>1.29 % more</b> (0.97 more to 1.62 more)     | ⊕○○○ VERY LOW | BELANGRIJK |  |
| <b>Morbidity (follow up: mean 1 years)</b>                |                       |                      |                      |              |                           |                                                  |                            |                         |                               |                                                    |               |            |  |
| 3                                                         | randomised trials     | not serious          | not serious          | not serious  | very serious <sup>e</sup> | none                                             | 12/54 (22.2%)              | 0/47 (0.0%)             | <b>OR 0.27</b> (0.13 to 0.41) | <b>0 fewer per 1.000</b> (from 0 fewer to 0 fewer) | ⊕⊕○○ LOW      | CRUCIAAL   |  |

CI: Confidence interval; MD: Mean difference; OR: Odds ratio
