# Supplementary material for: Clinical practice guidelines of the European Association for Endoscopic Surgery (EAES) on bariatric surgery: update 2020 endorsed by IFSO-EC, EASO and ESPCOP
Source: Springer Nature journal article supplement (doi:10.1007/s00464-020-07555-y), 2020-04-23
Supplement: MOESM47 [file 17923114]

**Question:** Should VBloc vs. non-surgical management be used for weight loss?

| Certainty assessment                       |                   |                      |               |              |                           |                      | No of patients                                                                                                                                                                                                                                                                                                             |                         | Effect                         |                   | Certainty                                             | Importance |            |
|--------------------------------------------|-------------------|----------------------|---------------|--------------|---------------------------|----------------------|----------------------------------------------------------------------------------------------------------------------------------------------------------------------------------------------------------------------------------------------------------------------------------------------------------------------------|-------------------------|--------------------------------|-------------------|-------------------------------------------------------|------------|------------|
| No of studies                              | Study design      | Risk of bias         | Inconsistency | Indirectness | Imprecision               | Other considerations | VBloc                                                                                                                                                                                                                                                                                                                      | non-surgical management | Relative (95% CI)              | Absolute (95% CI) |                                                       |            |            |
| <b>%EWL (follow up: mean 1 years)</b>      |                   |                      |               |              |                           |                      |                                                                                                                                                                                                                                                                                                                            |                         |                                |                   |                                                       |            |            |
| 2                                          | randomised trials | serious <sup>a</sup> | not serious   | not serious  | not serious               | none                 | One randomized double blind multicenter trial (n=192) and one randomized sham controlled trial (n=162) demonstrate excess weight loss of respectively 17% and 24.4% after 1 year of Vbloc-therapy. Unblinded follow up of VBloc-arm (n=123) of the sham controlled trial suggests sustained weight loss up till 24 months. |                         |                                |                   | ⊕⊕⊕○ MODERATE                                         | CRUCIAAL   |            |
| <b>IWQL (follow up: mean 1 years)</b>      |                   |                      |               |              |                           |                      |                                                                                                                                                                                                                                                                                                                            |                         |                                |                   |                                                       |            |            |
| 1                                          | randomised trials | not serious          | not serious   | not serious  | not serious               | none                 | 192                                                                                                                                                                                                                                                                                                                        | 102                     | -                              |                   | MD <b>2 more</b> (1.52 more to 2.48 more)             | ⊕⊕⊕⊕ HIGH  | BELANGRIJK |
| <b>Morbidity (follow up: mean 1 years)</b> |                   |                      |               |              |                           |                      |                                                                                                                                                                                                                                                                                                                            |                         |                                |                   |                                                       |            |            |
| 2                                          | randomised trials | not serious          | not serious   | not serious  | very serious <sup>b</sup> | none                 | 38/354 (10.7%)                                                                                                                                                                                                                                                                                                             | 12/179 (6.7%)           | <b>OR 3.05</b> (0.16 to 56.73) |                   | <b>113 more per 1.000</b> (from 56 fewer to 736 more) | ⊕⊕○○ LOW   | CRUCIAAL   |

CI: Confidence interval; MD: Mean difference; OR: Odds ratio
