# Supplementary material for: Clinical practice guidelines of the European Association for Endoscopic Surgery (EAES) on bariatric surgery: update 2020 endorsed by IFSO-EC, EASO and ESPCOP
Source: Springer Nature journal article supplement (doi:10.1007/s00464-020-07555-y), 2020-04-23
Supplement: MOESM48 [file 17923114]

**Question:** Should Duodenal Mucosal Resurfacing (DMR) vs. non-surgical management be used for weight loss?

| Certainty assessment                                |                       |                      |               |              |             |                      | Impact                                                                                             | Certainty        | Importance |
|-----------------------------------------------------|-----------------------|----------------------|---------------|--------------|-------------|----------------------|----------------------------------------------------------------------------------------------------|------------------|------------|
| N <sub>e</sub> of studies                           | Study design          | Risk of bias         | Inconsistency | Indirectness | Imprecision | Other considerations |                                                                                                    |                  |            |
| <b>Weight loss (follow up: mean 1 years)</b>        |                       |                      |               |              |             |                      |                                                                                                    |                  |            |
| 1                                                   | observational studies | serious <sup>a</sup> | not serious   | not serious  | not serious | none                 | One cohortstudy (n=46) reports weight loss of 3.1 kg and 2.1kg after respectively 6 and 12 months. | ⊕○○○<br>VERY LOW | CRUCIAAL   |
| <b>Hba1C% improvement (follow up: mean 1 years)</b> |                       |                      |               |              |             |                      |                                                                                                    |                  |            |
| 1                                                   | observational studies | serious <sup>a</sup> | not serious   | not serious  | not serious | none                 | One cohortstudy (n=46) reports slight improvement in HbA1C levels of 1.0% after 12 months.         | ⊕○○○<br>VERY LOW | BELANGRIJK |

CI: Confidence interval
