# Supplementary material for: Clinical practice guidelines of the European Association for Endoscopic Surgery (EAES) on bariatric surgery: update 2020 endorsed by IFSO-EC, EASO and ESPCOP
Source: Springer Nature journal article supplement (doi:10.1007/s00464-020-07555-y), 2020-04-23
Supplement: MOESM50 [file 17923114]

**Question:** Should Overstitch (endoscopic sleeve gastroplasty) vs. non-surgical management be used for weight loss ?

| Certainty assessment                                            |                       |                      |               |              |             |                      | Impact                                                                                                                                                                                                                                                                                                                                                        | Certainty        | Importance |
|-----------------------------------------------------------------|-----------------------|----------------------|---------------|--------------|-------------|----------------------|---------------------------------------------------------------------------------------------------------------------------------------------------------------------------------------------------------------------------------------------------------------------------------------------------------------------------------------------------------------|------------------|------------|
| N <sub>e</sub> of studies                                       | Study design          | Risk of bias         | Inconsistency | Indirectness | Imprecision | Other considerations |                                                                                                                                                                                                                                                                                                                                                               |                  |            |
| <b>Weight loss (%EWL) (follow up: range 1 years to 2 years)</b> |                       |                      |               |              |             |                      |                                                                                                                                                                                                                                                                                                                                                               |                  |            |
| 5                                                               | observational studies | serious <sup>a</sup> | not serious   | not serious  | not serious | none                 | In 209 patients the procedure resulted in a mean excess weight loss of 50%, with durability of plications. Three studies report progressive weight loss up till 24 months after procedure, respectively: 20.9% TBWL (n=8), 18.6% TBWL (n=57) , 60.4% EWL (n=28).                                                                                              | ⊕○○○<br>VERY LOW | CRUCIAAL   |
| <b>Improvement in HbA1c% (follow up: mean 2 years)</b>          |                       |                      |               |              |             |                      |                                                                                                                                                                                                                                                                                                                                                               |                  |            |
| 1                                                               | observational studies | serious <sup>a</sup> | not serious   | not serious  | not serious | none                 | One study (n=91) demonstrated resolution of diabetes in 2 subjects (15.4%) 2 years after procedure.                                                                                                                                                                                                                                                           | ⊕○○○<br>VERY LOW | BELANGRIJK |
| <b>Morbidity (follow up: range 1 years to 2 years)</b>          |                       |                      |               |              |             |                      |                                                                                                                                                                                                                                                                                                                                                               |                  |            |
| 5                                                               | observational studies | serious <sup>a</sup> | not serious   | not serious  | not serious | none                 | Adverse events were mainly nausea and post-discharge abdominal pain and were self-limiting. Reported serious adverse events among 209 subjects ;perigastric inflammatory fluid collections (n=3), extra gastric hemorrhage requiring blood transfusion (n=1), pulmonary embolism (n=1) pneumoperitoneum and pneumothorax requiring chest tube placement (n=1) | ⊕○○○<br>VERY LOW | CRUCIAAL   |

CI: Confidence interval
