# Supplementary material for: Clinical practice guidelines of the European Association for Endoscopic Surgery (EAES) on bariatric surgery: update 2020 endorsed by IFSO-EC, EASO and ESPCOP
Source: Surg Endosc. 2020 Apr 23;34(6):2332–58. doi: 10.1007/s00464-020-07555-y (PMC7214495; doi:10.1007/s00464-020-07555-y)
Supplement: Supplementary file 10 — Supplementary file10 (PDF 107 kb) [file 464_2020_7555_MOESM10_ESM.pdf]

**Question:** Should preoperative diet consultation vs. standard care be used for weight loss in patients undergoing bariatric surgery?

| Certainty assessment                                               |                   |              |               |              |             |                      | Nº of patients                 |               | Effect                        |                                                       | Certainty                                                                                       | Importance |
|--------------------------------------------------------------------|-------------------|--------------|---------------|--------------|-------------|----------------------|--------------------------------|---------------|-------------------------------|-------------------------------------------------------|-------------------------------------------------------------------------------------------------|------------|
| Nº of studies                                                      | Study design      | Risk of bias | Inconsistency | Indirectness | Imprecision | Other considerations | preoperative diet consultation | standard care | Relative (95% CI)             | Absolute (95% CI)                                     |                                                                                                 |            |
| Weight loss (follow up: range 2 weeks to 6 months)                 |                   |              |               |              |             |                      |                                |               |                               |                                                       |                                                                                                 |            |
| 3                                                                  | randomised trials | serious      | very serious  | not serious  | serious     | none                 | 220                            | 218           | -                             | SMD <b>0.4 SD higher</b> (0.03 higher to 0.78 higher) | 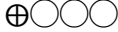<br>VERY LOW | CRITICAL   |
| Postoperative complications (follow up: range 2 weeks to 6 months) |                   |              |               |              |             |                      |                                |               |                               |                                                       |                                                                                                 |            |
| 2                                                                  | randomised trials | serious      | serious       | not serious  | not serious | none                 | 0/163 (0.0%)                   | 0/171 (0.0%)  | <b>RR 0.80</b> (0.22 to 2.86) | <b>0 fewer per 1.000</b> (from 0 fewer to 0 fewer)    | 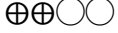<br>LOW      | CRITICAL   |

CI: Confidence interval; SMD: Standardised mean difference; RR: Risk ratio
