# Supplementary material for: Clinical practice guidelines of the European Association for Endoscopic Surgery (EAES) on bariatric surgery: update 2020 endorsed by IFSO-EC, EASO and ESPCOP
Source: Surg Endosc. 2020 Apr 23;34(6):2332–58. doi: 10.1007/s00464-020-07555-y (PMC7214495; doi:10.1007/s00464-020-07555-y)
Supplement: Supplementary file 14 — Supplementary file14 (PDF 102 kb) [file 464_2020_7555_MOESM14_ESM.pdf]

**Question:** Should perioperative CPAP vs. no CPAP be used for prevention of respiratory complications after bariatric surgery?

| Certainty assessment |                       |              |               |              |             |                      | № of patients      |              | Effect                    |                                                | Certainty        | Importance |
|----------------------|-----------------------|--------------|---------------|--------------|-------------|----------------------|--------------------|--------------|---------------------------|------------------------------------------------|------------------|------------|
| № of studies         | Study design          | Risk of bias | Inconsistency | Indirectness | Imprecision | Other considerations | perioperative CPAP | no CPAP      | Relative (95% CI)         | Absolute (95% CI)                              |                  |            |
| Mortality            |                       |              |               |              |             |                      |                    |              |                           |                                                |                  |            |
| 3                    | observational studies | not serious  | not serious   | not serious  | serious     | none                 | 0/268 (0.0%)       | 2/350 (0.6%) | OR 0.36<br>(0.02 to 7.63) | 4 fewer per 1.000<br>(from 6 fewer to 36 more) | ⊕○○○<br>VERY LOW | CRITICAL   |
