# Supplementary material for: Clinical practice guidelines of the European Association for Endoscopic Surgery (EAES) on bariatric surgery: update 2020 endorsed by IFSO-EC, EASO and ESPCOP
Source: Surg Endosc. 2020 Apr 23;34(6):2332–58. doi: 10.1007/s00464-020-07555-y (PMC7214495; doi:10.1007/s00464-020-07555-y)
Supplement: Supplementary file 20 — Supplementary file20 (PDF 141 kb) [file 464_2020_7555_MOESM20_ESM.pdf]

**Question:** Should sleeve gastrectomy vs. gastric plication be used for weight loss?

| Certainty assessment |              |              |               |              |             |                      | Nº of patients     |                   | Effect            |                   | Certainty | Importance |
|----------------------|--------------|--------------|---------------|--------------|-------------|----------------------|--------------------|-------------------|-------------------|-------------------|-----------|------------|
|                      |              |              |               |              |             |                      |                    |                   |                   |                   |           |            |
| Nº of studies        | Study design | Risk of bias | Inconsistency | Indirectness | Imprecision | Other considerations | sleeve gastrectomy | gastric plication | Relative (95% CI) | Absolute (95% CI) |           |            |

**EWL (follow up: range 4 months to 3 years)**

|   |                       |                           |                           |         |              |      |     |     |   |                                                |                                                                                                 |          |
|---|-----------------------|---------------------------|---------------------------|---------|--------------|------|-----|-----|---|------------------------------------------------|-------------------------------------------------------------------------------------------------|----------|
| 8 | observational studies | very serious <sup>a</sup> | very serious <sup>b</sup> | serious | very serious | none | 233 | 189 | - | MD <b>31 % higher</b> (10 higher to 72 higher) | 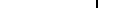<br>VERY LOW | CRITICAL |
|---|-----------------------|---------------------------|---------------------------|---------|--------------|------|-----|-----|---|------------------------------------------------|-------------------------------------------------------------------------------------------------|----------|

**EWL for gastric plication (follow up: mean 5 years)**

|   |                       |         |             |              |             |      |                                                                                     |                                                                                                 |          |
|---|-----------------------|---------|-------------|--------------|-------------|------|-------------------------------------------------------------------------------------|-------------------------------------------------------------------------------------------------|----------|
| 1 | observational studies | serious | not serious | very serious | not serious | none | % EWL at 5y 52.6%, SD 4.9, 95% CI 51.9 to 53.3; n=244, follow up completed by 86.9% | 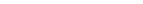<br>VERY LOW | CRITICAL |
|---|-----------------------|---------|-------------|--------------|-------------|------|-------------------------------------------------------------------------------------|-------------------------------------------------------------------------------------------------|----------|

### EWL for gastric plication (follow up: mean 10 years)

|   |                       |              |             |              |             |      |                                                      |                                                                                                 |          |
|---|-----------------------|--------------|-------------|--------------|-------------|------|------------------------------------------------------|-------------------------------------------------------------------------------------------------|----------|
| 1 | observational studies | very serious | not serious | very serious | not serious | none | % EWL at 10y 42%; n=800; follow up completed by 4.4% | 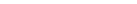<br>VERY LOW | CRITICAL |
|---|-----------------------|--------------|-------------|--------------|-------------|------|------------------------------------------------------|-------------------------------------------------------------------------------------------------|----------|

### Postoperative complications

|   |                       |         |         |             |         |      |                   |                   |                                  |                                                         |                                                                                                   |          |
|---|-----------------------|---------|---------|-------------|---------|------|-------------------|-------------------|----------------------------------|---------------------------------------------------------|---------------------------------------------------------------------------------------------------|----------|
| 9 | observational studies | serious | serious | not serious | serious | none | 80/335<br>(23.9%) | 39/350<br>(11.1%) | <b>OR 2.86</b><br>(1.47 to 5.88) | <b>153 more per 1,000</b><br>(from 44 more to 313 more) | 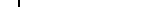<br>VERY LOW | CRITICAL |
|---|-----------------------|---------|---------|-------------|---------|------|-------------------|-------------------|----------------------------------|---------------------------------------------------------|---------------------------------------------------------------------------------------------------|----------|

## Readmission (follow up: 30 days)

|   |                       |                      |             |                      |              |      |              |              |                                  |                                                         |                  |           |
|---|-----------------------|----------------------|-------------|----------------------|--------------|------|--------------|--------------|----------------------------------|---------------------------------------------------------|------------------|-----------|
| 2 | observational studies | serious <sup>c</sup> | not serious | serious <sup>d</sup> | very serious | none | 3/101 (3.0%) | 3/100 (3.0%) | <b>OR 0.99</b><br>(0.19 to 5.05) | <b>0 fewer per 1.000</b><br>(from 24 fewer to 105 more) | ⊕○○○<br>VERY LOW | IMPORTANT |
|---|-----------------------|----------------------|-------------|----------------------|--------------|------|--------------|--------------|----------------------------------|---------------------------------------------------------|------------------|-----------|

**Readmission (follow up: range 30 days to 1 years)**

|   |                       |                      |             |                      |              |      |              |              |                                   |                                                        |                  |           |
|---|-----------------------|----------------------|-------------|----------------------|--------------|------|--------------|--------------|-----------------------------------|--------------------------------------------------------|------------------|-----------|
| 2 | observational studies | serious <sup>c</sup> | not serious | serious <sup>d</sup> | very serious | none | 1/101 (1.0%) | 1/100 (1.0%) | <b>OR 0.99</b><br>(0.06 to 16.07) | <b>0 fewer per 1.000</b><br>(from 9 fewer to 130 more) | ⊕○○○<br>VERY LOW | IMPORTANT |
|---|-----------------------|----------------------|-------------|----------------------|--------------|------|--------------|--------------|-----------------------------------|--------------------------------------------------------|------------------|-----------|

**Reoperation**

|   |                       |                      |             |                      |              |      |              |              |                                  |                                                       |                  |           |
|---|-----------------------|----------------------|-------------|----------------------|--------------|------|--------------|--------------|----------------------------------|-------------------------------------------------------|------------------|-----------|
| 2 | observational studies | serious <sup>c</sup> | not serious | serious <sup>d</sup> | very serious | none | 2/101 (2.0%) | 1/100 (1.0%) | <b>OR 0.66</b><br>(0.08 to 4.74) | <b>3 fewer per 1.000</b><br>(from 9 fewer to 36 more) | ⊕○○○<br>VERY LOW | IMPORTANT |
|---|-----------------------|----------------------|-------------|----------------------|--------------|------|--------------|--------------|----------------------------------|-------------------------------------------------------|------------------|-----------|

**Reoperation (follow up: range 30 days to 1 years)**

|   |                       |                      |             |                      |              |      |              |              |                                  |                                                       |                  |           |
|---|-----------------------|----------------------|-------------|----------------------|--------------|------|--------------|--------------|----------------------------------|-------------------------------------------------------|------------------|-----------|
| 2 | observational studies | serious <sup>c</sup> | not serious | serious <sup>d</sup> | very serious | none | 1/101 (1.0%) | 0/100 (0.0%) | <b>OR 0.32</b><br>(0.01 to 8.09) | <b>0 fewer per 1.000</b><br>(from 0 fewer to 0 fewer) | ⊕○○○<br>VERY LOW | IMPORTANT |
|---|-----------------------|----------------------|-------------|----------------------|--------------|------|--------------|--------------|----------------------------------|-------------------------------------------------------|------------------|-----------|

**Mortality**

|   |                       |                      |             |             |             |      |             |             |                                   |                                     |                  |          |
|---|-----------------------|----------------------|-------------|-------------|-------------|------|-------------|-------------|-----------------------------------|-------------------------------------|------------------|----------|
| 1 | observational studies | serious <sup>e</sup> | not serious | not serious | not serious | none | 0/40 (0.0%) | 0/40 (0.0%) | <b>RD 0.00</b><br>(-0.05 to 0.05) | <b>-- per 1.000</b><br>(from to --) | ⊕○○○<br>VERY LOW | CRITICAL |
|---|-----------------------|----------------------|-------------|-------------|-------------|------|-------------|-------------|-----------------------------------|-------------------------------------|------------------|----------|

**Hypertension remission (follow up: range 4 months to 3 years)**

|   |                       |              |                           |                      |              |      |               |              |                                   |                                     |                  |           |
|---|-----------------------|--------------|---------------------------|----------------------|--------------|------|---------------|--------------|-----------------------------------|-------------------------------------|------------------|-----------|
| 8 | observational studies | very serious | very serious <sup>f</sup> | serious <sup>a</sup> | very serious | none | 11/233 (4.7%) | 8/189 (4.2%) | <b>RD 0.14</b><br>(-0.57 to 0.29) | <b>-- per 1.000</b><br>(from to --) | ⊕○○○<br>VERY LOW | IMPORTANT |
|---|-----------------------|--------------|---------------------------|----------------------|--------------|------|---------------|--------------|-----------------------------------|-------------------------------------|------------------|-----------|

**Hypertension improvement (follow up: range 4 months to 3 years)**

|   |                       |                           |                           |                      |              |      |               |              |                                   |                                     |                                                                                                 |           |
|---|-----------------------|---------------------------|---------------------------|----------------------|--------------|------|---------------|--------------|-----------------------------------|-------------------------------------|-------------------------------------------------------------------------------------------------|-----------|
| 8 | observational studies | very serious <sup>a</sup> | very serious <sup>f</sup> | serious <sup>a</sup> | very serious | none | 10/233 (4.3%) | 7/189 (3.7%) | <b>RD 0.08</b><br>(-0.47 to 0.64) | <b>-- per 1.000</b><br>(from to --) | 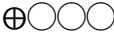<br>VERY LOW | IMPORTANT |
|---|-----------------------|---------------------------|---------------------------|----------------------|--------------|------|---------------|--------------|-----------------------------------|-------------------------------------|-------------------------------------------------------------------------------------------------|-----------|

**OSAS remission (follow up: range 4 months to 3 years)**

|   |                       |                           |             |                      |              |      |              |              |                                   |                                     |                                                                                                 |           |
|---|-----------------------|---------------------------|-------------|----------------------|--------------|------|--------------|--------------|-----------------------------------|-------------------------------------|-------------------------------------------------------------------------------------------------|-----------|
| 8 | observational studies | very serious <sup>a</sup> | not serious | serious <sup>a</sup> | very serious | none | 5/233 (2.1%) | 2/189 (1.1%) | <b>RD 0.45</b><br>(-1.00 to 0.10) | <b>-- per 1.000</b><br>(from to --) | 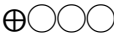<br>VERY LOW | IMPORTANT |
|---|-----------------------|---------------------------|-------------|----------------------|--------------|------|--------------|--------------|-----------------------------------|-------------------------------------|-------------------------------------------------------------------------------------------------|-----------|

**OSAS improvement (follow up: range 4 months to 3 years)**

|   |                       |                           |             |                      |              |      |              |              |                                  |                                     |                                                                                                 |           |
|---|-----------------------|---------------------------|-------------|----------------------|--------------|------|--------------|--------------|----------------------------------|-------------------------------------|-------------------------------------------------------------------------------------------------|-----------|
| 8 | observational studies | very serious <sup>a</sup> | not serious | serious <sup>a</sup> | very serious | none | 1/233 (0.4%) | 3/189 (1.6%) | <b>RD 0.45</b><br>(0.10 to 1.00) | <b>-- per 1.000</b><br>(from to --) | 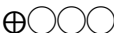<br>VERY LOW | IMPORTANT |
|---|-----------------------|---------------------------|-------------|----------------------|--------------|------|--------------|--------------|----------------------------------|-------------------------------------|-------------------------------------------------------------------------------------------------|-----------|

**T2DM remission (follow up: range 3 months to 18 months)**

|   |                       |                           |             |                      |             |      |             |             |                                  |                                                       |                                                                                                 |           |
|---|-----------------------|---------------------------|-------------|----------------------|-------------|------|-------------|-------------|----------------------------------|-------------------------------------------------------|-------------------------------------------------------------------------------------------------|-----------|
| 1 | observational studies | very serious <sup>g</sup> | not serious | serious <sup>g</sup> | not serious | none | 0/84 (0.0%) | 0/43 (0.0%) | <b>OR 0.41</b><br>(0.16 to 1.04) | <b>0 fewer per 1.000</b><br>(from 0 fewer to 0 fewer) | 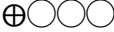<br>VERY LOW | IMPORTANT |
|---|-----------------------|---------------------------|-------------|----------------------|-------------|------|-------------|-------------|----------------------------------|-------------------------------------------------------|-------------------------------------------------------------------------------------------------|-----------|

**CI:** Confidence interval; **MD:** Mean difference; **OR:** Odds ratio
