# Supplementary material for: Clinical practice guidelines of the European Association for Endoscopic Surgery (EAES) on bariatric surgery: update 2020 endorsed by IFSO-EC, EASO and ESPCOP
Source: Surg Endosc. 2020 Apr 23;34(6):2332–58. doi: 10.1007/s00464-020-07555-y (PMC7214495; doi:10.1007/s00464-020-07555-y)
Supplement: Supplementary file 22 — Supplementary file22 (PDF 112 kb) [file 464_2020_7555_MOESM22_ESM.pdf]

**Question:** Should sleeve gastrectomy calibrated on bougie size  $\leq 36$  Fr vs.  $> 36$  Fr be used for weight loss?

| Certainty assessment                                            |                       |              |               |              |             |                      | N <sub>e</sub> of patients                           |         | Effect                    |                                                | Certainty        | Importance |
|-----------------------------------------------------------------|-----------------------|--------------|---------------|--------------|-------------|----------------------|------------------------------------------------------|---------|---------------------------|------------------------------------------------|------------------|------------|
| N <sub>e</sub> of studies                                       | Study design          | Risk of bias | Inconsistency | Indirectness | Imprecision | Other considerations | sleeve gastrectomy calibrated on bougie size <=36 Fr | > 36 Fr | Relative (95% CI)         | Absolute (95% CI)                              |                  |            |
| Weight loss (follow up: range 12 months to 60 months)           |                       |              |               |              |             |                      |                                                      |         |                           |                                                |                  |            |
| 4                                                               | observational studies | not serious  | not serious   | not serious  | not serious | strong association   |                                                      |         | OR 0.23<br>(0.14 to 0.33) | 0 fewer per 1.000<br>(from 0 fewer to 0 fewer) | ⊕⊕⊕○<br>MODERATE | CRITICAL   |
| Leaks (follow up: range 12 months to 60 months)                 |                       |              |               |              |             |                      |                                                      |         |                           |                                                |                  |            |
| 7                                                               | observational studies | not serious  | not serious   | serious      | serious     | none                 |                                                      |         | OR 0.91<br>(0.67 to 1.24) | 1 fewer per 1.000<br>(from 1 fewer to 1 fewer) | ⊕○○○<br>VERY LOW | CRITICAL   |
| GERD (follow up: range 12 months to 60 months)                  |                       |              |               |              |             |                      |                                                      |         |                           |                                                |                  |            |
| 3                                                               | observational studies | not serious  | serious       | serious      | serious     | none                 |                                                      |         | OR 0.77<br>(0.37 to 1.59) | 1 fewer per 1.000<br>(from 2 fewer to 0 fewer) | ⊕○○○<br>VERY LOW | IMPORTANT  |
| Overall complications (follow up: range 12 months to 60 months) |                       |              |               |              |             |                      |                                                      |         |                           |                                                |                  |            |
| 8                                                               | observational studies | not serious  | serious       | serious      | serious     | none                 |                                                      |         | OR 1.00<br>(0.73 to 1.37) | 1 fewer per 1.000<br>(from 1 fewer to 1 fewer) | ⊕○○○<br>VERY LOW | CRITICAL   |

**CI:** Confidence interval; **OR:** Odds ratio
