# Supplementary material for: Clinical practice guidelines of the European Association for Endoscopic Surgery (EAES) on bariatric surgery: update 2020 endorsed by IFSO-EC, EASO and ESPCOP
Source: Surg Endosc. 2020 Apr 23;34(6):2332–58. doi: 10.1007/s00464-020-07555-y (PMC7214495; doi:10.1007/s00464-020-07555-y)
Supplement: Supplementary file 24 — Supplementary file24 (PDF 67 kb) [file 464_2020_7555_MOESM24_ESM.pdf]

**Question:** Should RYGB vs. LAGB be used for weight loss in obese patients?

| Certainty assessment                                        |                   |              |               |              |               |                      | No of patients |             | Effect                        |                                                      | Certainty | Importance |
|-------------------------------------------------------------|-------------------|--------------|---------------|--------------|---------------|----------------------|----------------|-------------|-------------------------------|------------------------------------------------------|-----------|------------|
| No of studies                                               | Study design      | Risk of bias | Inconsistency | Indirectness | Imprecision   | Other considerations | RYGB           | LAGB        | Relative (95% CI)             | Absolute (95% CI)                                    |           |            |
| EWL (follow up: range 1 years to 5 years; assessed with: %) |                   |              |               |              |               |                      |                |             |                               |                                                      |           |            |
| 11                                                          | randomised trials | serious      | not serious   | not serious  | not serious a | strong association   | 0              | 0           | -                             | MD <b>22 % higher</b> (6.5 higher to 34 higher)      | ⊕⊕⊕⊕ HIGH | IMPORTANT  |
| T2DM (follow up: range 3 months to 5 years)                 |                   |              |               |              |               |                      |                |             |                               |                                                      |           |            |
| 25                                                          | randomised trials | serious      | not serious   | not serious  | serious b     | none                 | 5/24 (20.8%)   | 2/23 (8.7%) | RR <b>1.96</b> (0.47 to 8.33) | <b>83 more per 1.000</b> (from 46 fewer to 637 more) | ⊕⊕○○ LOW  | IMPORTANT  |

CI: Confidence interval; MD: Mean difference; RR: Risk ratio
