# Supplementary material for: Clinical practice guidelines of the European Association for Endoscopic Surgery (EAES) on bariatric surgery: update 2020 endorsed by IFSO-EC, EASO and ESPCOP
Source: Surg Endosc. 2020 Apr 23;34(6):2332–58. doi: 10.1007/s00464-020-07555-y (PMC7214495; doi:10.1007/s00464-020-07555-y)
Supplement: Supplementary file 27 — Supplementary file27 (PDF 68 kb) [file 464_2020_7555_MOESM27_ESM.pdf]

**Question:** Should BPD/DS vs. sleeve gastrectomy be used for weight loss?

| Certainty assessment |                       |              |               |              |                           |                      | № of patients |                    | Effect                          |                                                     | Certainty        | Importance |
|----------------------|-----------------------|--------------|---------------|--------------|---------------------------|----------------------|---------------|--------------------|---------------------------------|-----------------------------------------------------|------------------|------------|
| № of studies         | Study design          | Risk of bias | Inconsistency | Indirectness | Imprecision               | Other considerations | BPD/DS        | sleeve gastrectomy | Relative (95% CI)               | Absolute (95% CI)                                   |                  |            |
| 30-day morbidity     |                       |              |               |              |                           |                      |               |                    |                                 |                                                     |                  |            |
| 2                    | observational studies | not serious  | not serious   | not serious  | very serious <sup>a</sup> | none                 | 10/267 (3.7%) | 6/674 (0.9%)       | <b>OR 5.10</b> (0.24 to 107.62) | <b>35 more per 1.000</b> (from 7 fewer to 483 more) | ⊕○○○<br>VERY LOW | CRITICAL   |
| 30-day mortality     |                       |              |               |              |                           |                      |               |                    |                                 |                                                     |                  |            |
| 2                    | observational studies | not serious  | not serious   | not serious  | very serious <sup>a</sup> | none                 | 0/267 (0.0%)  | 0/674 (0.0%)       | not estimable                   | <b>0 fewer per 1.000</b> (from 10 fewer to 10 more) | ⊕○○○<br>VERY LOW | CRITICAL   |
| Overall mortality    |                       |              |               |              |                           |                      |               |                    |                                 |                                                     |                  |            |
| 1                    | observational studies | not serious  | not serious   | not serious  | very serious <sup>b</sup> | none                 | 0/100 (0.0%)  | 0/100 (0.0%)       | <b>RD 0.00</b> (-0.01 to 0.01)  | <b>0 fewer per 1.000</b> (from 20 fewer to 20 more) | ⊕○○○<br>VERY LOW | CRITICAL   |

**CI:** Confidence interval; **OR:** Odds ratio
