# Supplementary material for: Clinical practice guidelines of the European Association for Endoscopic Surgery (EAES) on bariatric surgery: update 2020 endorsed by IFSO-EC, EASO and ESPCOP
Source: Surg Endosc. 2020 Apr 23;34(6):2332–58. doi: 10.1007/s00464-020-07555-y (PMC7214495; doi:10.1007/s00464-020-07555-y)
Supplement: Supplementary file 30 — Supplementary file30 (PDF 90 kb) [file 464_2020_7555_MOESM30_ESM.pdf]

**Question:** Should OAGB vs. AGB be used for weight loss?

| Certainty assessment      |              |              |               |              |             |                      | N <sub>e</sub> of patients |      | Effect            |                   | Certainty | Importance |
|---------------------------|--------------|--------------|---------------|--------------|-------------|----------------------|----------------------------|------|-------------------|-------------------|-----------|------------|
| N <sub>e</sub> of studies | Study design | Risk of bias | Inconsistency | Indirectness | Imprecision | Other considerations | OAGB                       | LAGB | Relative (95% CI) | Absolute (95% CI) |           |            |

**Post-operative BMI (follow up: mean 1 years; assessed with: kg/m2)**

|   |                       |         |              |             |             |                                     |     |      |                                     |                                       |                  |  |
|---|-----------------------|---------|--------------|-------------|-------------|-------------------------------------|-----|------|-------------------------------------|---------------------------------------|------------------|--|
| 4 | observational studies | serious | very serious | not serious | not serious | publication bias strongly suspected | 0/0 | 0.0% | <b>MD -6.58</b><br>(-9.37 to -3.79) | <b>-- per 1.000</b><br>(from - to --) | ⊕○○○<br>VERY LOW |  |
|---|-----------------------|---------|--------------|-------------|-------------|-------------------------------------|-----|------|-------------------------------------|---------------------------------------|------------------|--|

**T2DM remission (follow up: mean 1 years)**

|   |                       |         |             |             |             |      |     |      |                                  |                                                       |                  |  |
|---|-----------------------|---------|-------------|-------------|-------------|------|-----|------|----------------------------------|-------------------------------------------------------|------------------|--|
| 2 | observational studies | serious | not serious | not serious | not serious | none | 0/0 | 0.0% | <b>RR 1.48</b><br>(0.98 to 2.25) | <b>0 fewer per 1.000</b><br>(from 0 fewer to 0 fewer) | ⊕○○○<br>VERY LOW |  |
|---|-----------------------|---------|-------------|-------------|-------------|------|-----|------|----------------------------------|-------------------------------------------------------|------------------|--|

**Post-operative Waist Circumference (follow up: mean 1 years)**

|   |                       |         |              |             |         |                    |     |      |                                      |                                       |                  |  |
|---|-----------------------|---------|--------------|-------------|---------|--------------------|-----|------|--------------------------------------|---------------------------------------|------------------|--|
| 3 | observational studies | serious | very serious | not serious | serious | strong association | 0/0 | 0.0% | <b>MD 14.15</b><br>(-27.23 to -1.06) | <b>-- per 1.000</b><br>(from - to --) | ⊕○○○<br>VERY LOW |  |
|---|-----------------------|---------|--------------|-------------|---------|--------------------|-----|------|--------------------------------------|---------------------------------------|------------------|--|

**CI:** Confidence interval; **RR:** Risk ratio
