# Supplementary material for: Clinical practice guidelines of the European Association for Endoscopic Surgery (EAES) on bariatric surgery: update 2020 endorsed by IFSO-EC, EASO and ESPCOP
Source: Surg Endosc. 2020 Apr 23;34(6):2332–58. doi: 10.1007/s00464-020-07555-y (PMC7214495; doi:10.1007/s00464-020-07555-y)
Supplement: Supplementary file 31 — Supplementary file31 (PDF 69 kb) [file 464_2020_7555_MOESM31_ESM.pdf]

**Question:** Should OAGB vs. sleeve gastrectomy be used for weight loss?

| Certainty assessment                                           |                       |              |               |              |             |                                     | № of patients |      | Effect                                |                                                       | Certainty        | Importance |
|----------------------------------------------------------------|-----------------------|--------------|---------------|--------------|-------------|-------------------------------------|---------------|------|---------------------------------------|-------------------------------------------------------|------------------|------------|
| № of studies                                                   | Study design          | Risk of bias | Inconsistency | Indirectness | Imprecision | Other considerations                | OAGB          | LAGB | Relative (95% CI)                     | Absolute (95% CI)                                     |                  |            |
| Post-operative BMI (follow up: mean 1 years; assessed with: %) |                       |              |               |              |             |                                     |               |      |                                       |                                                       |                  |            |
| 4                                                              | observational studies | serious      | very serious  | not serious  | not serious | publication bias strongly suspected | 0/0           | 0.0% | <b>MD -6.58</b><br>(-9.37 to -3.79)   | <b>-- per 1.000</b><br>(from -to --)                  | ⊕○○○<br>VERY LOW |            |
| T2DM remission (follow up: mean 1 years)                       |                       |              |               |              |             |                                     |               |      |                                       |                                                       |                  |            |
| 2                                                              | observational studies | serious      | not serious   | not serious  | not serious | none                                | 0/0           | 0.0% | <b>RR 1.48</b><br>(0.98 to 2.25)      | <b>0 fewer per 1.000</b><br>(from 0 fewer to 0 fewer) | ⊕○○○<br>VERY LOW |            |
| Post-operative Waist Circumference (follow up: mean 1 years)   |                       |              |               |              |             |                                     |               |      |                                       |                                                       |                  |            |
| 3                                                              | observational studies | serious      | very serious  | not serious  | serious     | strong association                  | 0/0           | 0.0% | <b>MD -14.15</b><br>(-27.23 to -1.06) | <b>-- per 1.000</b><br>(from -to --)                  | ⊕○○○<br>VERY LOW |            |

CI: Confidence interval; RR: Risk ratio
