# Supplementary material for: Clinical practice guidelines of the European Association for Endoscopic Surgery (EAES) on bariatric surgery: update 2020 endorsed by IFSO-EC, EASO and ESPCOP
Source: Surg Endosc. 2020 Apr 23;34(6):2332–58. doi: 10.1007/s00464-020-07555-y (PMC7214495; doi:10.1007/s00464-020-07555-y)
Supplement: Supplementary file 33 — Supplementary file33 (PDF 70 kb) [file 464_2020_7555_MOESM33_ESM.pdf]

**Question:** Should SADI-S vs. RYGB be used for weight loss?

| Certainty assessment                                 |                       |              |               |              |             |                      | N <sub>o</sub> of patients                                       |               | Effect                            |                                                             | Certainty        | Importance |
|------------------------------------------------------|-----------------------|--------------|---------------|--------------|-------------|----------------------|------------------------------------------------------------------|---------------|-----------------------------------|-------------------------------------------------------------|------------------|------------|
| N <sub>o</sub> of studies                            | Study design          | Risk of bias | Inconsistency | Indirectness | Imprecision | Other considerations | SADI-S                                                           | RYGB          | Relative (95% CI)                 | Absolute (95% CI)                                           |                  |            |
| Weight loss (follow up: 18 months; assessed with: %) |                       |              |               |              |             |                      |                                                                  |               |                                   |                                                             |                  |            |
| 1                                                    | observational studies | serious      | not serious   | not serious  | serious     | none                 | SADI-S: 41, 95% CI 39.3 to 42.7; RYGB: 39.6, 95% CI 36.6 to 42.6 |               |                                   | ⊕○○○<br>VERY LOW                                            | CRITICAL         |            |
| Morbidity (follow up: 30 days)                       |                       |              |               |              |             |                      |                                                                  |               |                                   |                                                             |                  |            |
| 1                                                    | observational studies | serious      | not serious   | not serious  | serious     | none                 | 9/54 (16.7%)                                                     | 34/54 (63.0%) | <b>OR 0.12</b><br>(0.05 to 0.29)  | <b>460 fewer per 1.000</b><br>(from 551 fewer to 299 fewer) | ⊕○○○<br>VERY LOW | CRITICAL   |
| Mortality (follow up: 30 days)                       |                       |              |               |              |             |                      |                                                                  |               |                                   |                                                             |                  |            |
| 1                                                    | observational studies | serious      | not serious   | not serious  | not serious | none                 | 0/54 (0.0%)                                                      | 0/54 (0.0%)   | <b>RD 0.00</b><br>(-0.04 to 0.04) | <b>0 fewer per 1.000</b><br>(from 40 fewer to 40 more)      | ⊕○○○<br>VERY LOW | CRITICAL   |

CI: Confidence interval; OR: Odds ratio
