# Supplementary material for: Clinical practice guidelines of the European Association for Endoscopic Surgery (EAES) on bariatric surgery: update 2020 endorsed by IFSO-EC, EASO and ESPCOP
Source: Surg Endosc. 2020 Apr 23;34(6):2332–58. doi: 10.1007/s00464-020-07555-y (PMC7214495; doi:10.1007/s00464-020-07555-y)
Supplement: Supplementary file 34 — Supplementary file34 (PDF 108 kb) [file 464_2020_7555_MOESM34_ESM.pdf]

**Question:** Should SADI-S vs. BPD/DS be used for weight loss?

| Certainty assessment                         |                       |              |               |              |              |                         | № of patients                                                         |              | Effect                   |                                                           | Certainty                                                 | Importance |
|----------------------------------------------|-----------------------|--------------|---------------|--------------|--------------|-------------------------|-----------------------------------------------------------------------|--------------|--------------------------|-----------------------------------------------------------|-----------------------------------------------------------|------------|
| № of studies                                 | Study design          | Risk of bias | Inconsistency | Indirectness | Imprecision  | Other considerations    | SADI-S                                                                | BPD/DS       | Relative (95% CI)        | Absolute (95% CI)                                         |                                                           |            |
| EWL (follow up: 24 months; assessed with: %) |                       |              |               |              |              |                         |                                                                       |              |                          |                                                           |                                                           |            |
| 1                                            | observational studies | serious      | not serious   | not serious  | not serious  | none                    | SADI-S: 87.1, 95% CI 83.8 to 90.3; BPD/DS: 94.9%, 95% CI 91.6 to 98.2 |              |                          | <div><div>⊕</div><div>◯◯◯◯</div><div>VERY LOW</div></div> | CRITICAL                                                  |            |
| Short term morbidity (follow up: 30 days)    |                       |              |               |              |              |                         |                                                                       |              |                          |                                                           |                                                           |            |
| 1                                            | observational studies | serious      | not serious   | not serious  | very serious | very strong association | 13/62 (21.0%)                                                         | 2/120 (1.7%) | OR 15.65 (3.40 to 71.96) | 193 more per 1.000 (from 38 more to 533 more)             | <div><div>⊕</div><div>◯◯◯◯</div><div>VERY LOW</div></div> | CRITICAL   |
