# Supplementary material for: Clinical practice guidelines of the European Association for Endoscopic Surgery (EAES) on bariatric surgery: update 2020 endorsed by IFSO-EC, EASO and ESPCOP
Source: Surg Endosc. 2020 Apr 23;34(6):2332–58. doi: 10.1007/s00464-020-07555-y (PMC7214495; doi:10.1007/s00464-020-07555-y)
Supplement: Supplementary file 40 — Supplementary file40 (PDF 104 kb) [file 464_2020_7555_MOESM40_ESM.pdf]

**Question:** Should nutritional (micro and/or macronutrients) supplementation vs. no supplementation be used in in patients undergoing bariatric surgery?

| Certainty assessment      |                   |              |               |              |             |                                     | N <sub>e</sub> of patients                                |                    | Effect                           |                                                       | Certainty                                                                                       | Importance |
|---------------------------|-------------------|--------------|---------------|--------------|-------------|-------------------------------------|-----------------------------------------------------------|--------------------|----------------------------------|-------------------------------------------------------|-------------------------------------------------------------------------------------------------|------------|
| N <sub>e</sub> of studies | Study design      | Risk of bias | Inconsistency | Indirectness | Imprecision | Other considerations                | nutritional (micro and/or macronutrients) supplementation | no supplementation | Relative (95% CI)                | Absolute (95% CI)                                     |                                                                                                 |            |
| 5                         | randomised trials | serious      | serious       | not serious  | not serious | publication bias strongly suspected |                                                           |                    | <b>RR 3.82</b><br>(1.70 to 8.57) | <b>4 fewer per 1.000</b><br>(from 9 fewer to 2 fewer) | 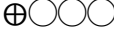<br>VERY LOW |            |

CI: Confidence interval; RR: Risk ratio
