# Supplementary material for: Clinical practice guidelines of the European Association for Endoscopic Surgery (EAES) on bariatric surgery: update 2020 endorsed by IFSO-EC, EASO and ESPCOP
Source: Surg Endosc. 2020 Apr 23;34(6):2332–58. doi: 10.1007/s00464-020-07555-y (PMC7214495; doi:10.1007/s00464-020-07555-y)
Supplement: Supplementary file 41 — Supplementary file41 (PDF 102 kb) [file 464_2020_7555_MOESM41_ESM.pdf]

**Question:** Should PPI treatment vs. no treatment be used in patients undergoing bariatric surgery?

| Certainty assessment                                               |                       |              |               |              |             |                      | Nº of patients |                 | Effect                           |                                                           | Certainty                                                                             | Importance |
|--------------------------------------------------------------------|-----------------------|--------------|---------------|--------------|-------------|----------------------|----------------|-----------------|----------------------------------|-----------------------------------------------------------|---------------------------------------------------------------------------------------|------------|
| Nº of studies                                                      | Study design          | Risk of bias | Inconsistency | Indirectness | Imprecision | Other considerations | PPI treatment  | no treatment    | Relative (95% CI)                | Absolute (95% CI)                                         |                                                                                       |            |
| Marginal ulcer formation (follow up: range 6 months to 144 months) |                       |              |               |              |             |                      |                |                 |                                  |                                                           |                                                                                       |            |
| 3                                                                  | observational studies | serious      | not serious   | serious      | not serious | strong association   | 24/315 (7.6%)  | 121/707 (17.1%) | <b>OR 0.50</b><br>(0.29 to 0.90) | <b>78 fewer per 1.000</b><br>(from 115 fewer to 14 fewer) | <div><div><div></div><div></div><div></div><div></div></div><div>MODERATE</div></div> |            |

CI: Confidence interval; OR: Odds ratio
