# Supplementary material for: Clinical practice guidelines of the European Association for Endoscopic Surgery (EAES) on bariatric surgery: update 2020 endorsed by IFSO-EC, EASO and ESPCOP
Source: Surg Endosc. 2020 Apr 23;34(6):2332–58. doi: 10.1007/s00464-020-07555-y (PMC7214495; doi:10.1007/s00464-020-07555-y)
Supplement: Supplementary file 45 — Supplementary file45 (PDF 71 kb) [file 464_2020_7555_MOESM45_ESM.pdf]

**Question:** Should AspireAssist® vs. non-surgical management be used for weight loss?

| Certainty assessment                            |                   |                          |               |              |                           |                      | N <sub>e</sub> of patients |                         | Effect                         |                                                    | Certainty     | Importance |
|-------------------------------------------------|-------------------|--------------------------|---------------|--------------|---------------------------|----------------------|----------------------------|-------------------------|--------------------------------|----------------------------------------------------|---------------|------------|
| N <sub>e</sub> of studies                       | Study design      | Risk of bias             | Inconsistency | Indirectness | Imprecision               | Other considerations | Aspire Assist              | non-surgical management | Relative (95% CI)              | Absolute (95% CI)                                  |               |            |
| %EWL (follow up: mean 1 years)                  |                   |                          |               |              |                           |                      |                            |                         |                                |                                                    |               |            |
| 1                                               | randomised trials | not serious <sup>a</sup> | not serious   | not serious  | serious <sup>b</sup>      | none                 | 82                         | 31                      | -                              | MD <b>21.7 % more</b> (13.75 more to 29.65 more)   | ⊕⊕⊕○ MODERATE | CRUCIAAL   |
| IWQL (follow up: mean 1 years)                  |                   |                          |               |              |                           |                      |                            |                         |                                |                                                    |               |            |
| 1                                               | randomised trials | not serious              | not serious   | not serious  | serious <sup>c</sup>      | none                 | 82                         | 31                      | -                              | MD <b>2.9 higher</b> (1.66 lower to 7.46 higher)   | ⊕⊕⊕○ MODERATE | BELANGRIJK |
| Improvement in %HbA1c (follow up: mean 1 years) |                   |                          |               |              |                           |                      |                            |                         |                                |                                                    |               |            |
| 1                                               | randomised trials | not serious              | not serious   | not serious  | not serious               | none                 | 82                         | 31                      | -                              | MD <b>0.14 more</b> (0 to 0.28 more)               | ⊕⊕⊕⊕ HIGH     | BELANGRIJK |
| Morbidity (follow up: mean 1 years)             |                   |                          |               |              |                           |                      |                            |                         |                                |                                                    |               |            |
| 1                                               | randomised trials | not serious              | not serious   | not serious  | very serious <sup>d</sup> | none                 | 5/82 (6.1%)                | 0/31 (0.0%)             | <b>OR 4.47</b> (0.24 to 83.27) | <b>0 fewer per 1.000</b> (from 0 fewer to 0 fewer) | ⊕⊕○○ LOW      | CRUCIAAL   |

CI: Confidence interval; MD: Mean difference; OR: Odds ratio
