# Supplementary material for: Clinical practice guidelines of the European Association for Endoscopic Surgery (EAES) on bariatric surgery: update 2020 endorsed by IFSO-EC, EASO and ESPCOP
Source: Surg Endosc. 2020 Apr 23;34(6):2332–58. doi: 10.1007/s00464-020-07555-y (PMC7214495; doi:10.1007/s00464-020-07555-y)
Supplement: Supplementary file 46 — Supplementary file46 (PDF 63 kb) [file 464_2020_7555_MOESM46_ESM.pdf]

**Question:** Should abiliti® vs. non-surgical management be used for weight loss?

| Certainty assessment                         |                       |                      |               |              |                      |                      | Impact                                                                                                                                                                                                                                                                                    | Certainty        | Importance |
|----------------------------------------------|-----------------------|----------------------|---------------|--------------|----------------------|----------------------|-------------------------------------------------------------------------------------------------------------------------------------------------------------------------------------------------------------------------------------------------------------------------------------------|------------------|------------|
| N <sub>e</sub> of studies                    | Study design          | Risk of bias         | Inconsistency | Indirectness | Imprecision          | Other considerations |                                                                                                                                                                                                                                                                                           |                  |            |
| Weight loss (%EWL) (follow up: mean 1 years) |                       |                      |               |              |                      |                      |                                                                                                                                                                                                                                                                                           |                  |            |
| 3                                            | observational studies | serious <sup>a</sup> | not serious   | not serious  | serious <sup>b</sup> | none                 | In three studies, with a total of 102 subjects receiving Abiliti, the device demonstrated significant excess weight loss after 1 year, respectively: 28.7% EWL (n=31) , 40.7 (n=45) and 49.3% (n=26). One study shows stable weight loss of 27.5% EWL after a period of 27 months (n=16). | ⊕○○○<br>VERY LOW | CRUCIAAL   |
| Morbidity                                    |                       |                      |               |              |                      |                      |                                                                                                                                                                                                                                                                                           |                  |            |
| 3                                            | observational studies | not serious          | not serious   | not serious  | not serious          |                      | Procedure is well-tolerated with self-limiting adverse events, mainly abdominal pain. Reported SAE's across studies were severe recurrent seroma (n=1) and postsurgical superficial wound infection (n=1)                                                                                 | -                | CRUCIAAL   |

CI: Confidence interval; MD: Mean difference
