# Supplementary material for: Clinical practice guidelines of the European Association for Endoscopic Surgery (EAES) on bariatric surgery: update 2020 endorsed by IFSO-EC, EASO and ESPCOP
Source: Surg Endosc. 2020 Apr 23;34(6):2332–58. doi: 10.1007/s00464-020-07555-y (PMC7214495; doi:10.1007/s00464-020-07555-y)
Supplement: Supplementary file 49 — Supplementary file49 (PDF 107 kb) [file 464_2020_7555_MOESM49_ESM.pdf]

**Question:** Should Pose® vs. non-surgical management be used for weight loss?

| Certainty assessment                             |                   |              |               |              |             |                      | Impact                                                                                                                                                                                                                                                                                | Certainty        | Importance |
|--------------------------------------------------|-------------------|--------------|---------------|--------------|-------------|----------------------|---------------------------------------------------------------------------------------------------------------------------------------------------------------------------------------------------------------------------------------------------------------------------------------|------------------|------------|
| Nº of studies                                    | Study design      | Risk of bias | Inconsistency | Indirectness | Imprecision | Other considerations |                                                                                                                                                                                                                                                                                       |                  |            |
| Weight loss (follow up: mean 1 years)            |                   |              |               |              |             |                      |                                                                                                                                                                                                                                                                                       |                  |            |
| 3                                                | randomised trials | serious      | not serious   | not serious  | not serious | none                 | Total of 359 patients receiving POSE. Two studies ((nonblinded RCT and prospective cohort) showed mean excess weight loss of 45% after 1 year in respectively 30 and 116 patients. Another study (sham-controlled RCT) showed excess weight loss of 16% after 1 year in 213 patients. | ⊕⊕⊕○<br>MODERATE | CRUCIAAL   |
| Resolution of diabetes (follow up: mean 1 years) |                   |              |               |              |             |                      |                                                                                                                                                                                                                                                                                       |                  |            |
| 1                                                | randomised trials | serious      | not serious   | not serious  | not serious | none                 | One sham-controlled trial (n=213) reports resolution in 9/16 diabetic subjects (56,3%) after 1 year                                                                                                                                                                                   | ⊕⊕⊕○<br>MODERATE | BELANGRIJK |
| Quality of life (follow up: mean 1 years)        |                   |              |               |              |             |                      |                                                                                                                                                                                                                                                                                       |                  |            |
| 1                                                | randomised trials | serious      | not serious   | not serious  | not serious | none                 | One sham-controlled trial (n=213) reports significant improvement from severe to a borderline mild impact on quality of life after 1 year when compared to sham subjects.                                                                                                             | ⊕⊕⊕○<br>MODERATE | CRUCIAAL   |
| Morbidity (follow up: mean 1 years)              |                   |              |               |              |             |                      |                                                                                                                                                                                                                                                                                       |                  |            |
| 1                                                | randomised trials | serious      | not serious   | not serious  | not serious | none                 | 1% reported SAE's: extragastric bleed (n=1) and hepatic abcess (n=1)                                                                                                                                                                                                                  | ⊕⊕⊕○<br>MODERATE | CRUCIAAL   |

CI: Confidence interval
